# Supplementary material for: (Phosphino)(stannyl)carbene
Source: Royal Society of Chemistry journal article supplement (doi:10.1039/d4cc03275f), 2024-01-01
Supplement: d4cc03275f1.pdf [file d4cc03275f1.pdf]

## (Phosphino)(stannyl)carbene

Rui Wei, Xin-Feng Wang, Chaopeng Hu, Liu Leo Liu\*

Department of Chemistry and Research Center for Chemical Biology and Omics Analysis,  
College of Science, Southern University of Science and Technology, Shenzhen 518055 China

### Table of Contents

|                                       |     |
|---------------------------------------|-----|
| I. General Information .....          | S2  |
| II. Experimental Details .....        | S3  |
| III. NMR Spectra.....                 | S7  |
| IV. X-ray Crystallographic Data ..... | S16 |
| V. Computational Details .....        | S22 |
| VI. References .....                  | S38 |

## I. General Information

All reactions were carried out under an inert gas atmosphere by using either standard Schlenk or in a N<sub>2</sub>-filled glove box. Solvents were dried by distillation over sodium/potassium alloy or LiAlH<sub>4</sub> and stored with 4Å molecular sieves before use. NMR spectra were recorded with Bruker Avance 400 (<sup>1</sup>H: 400 MHz, <sup>13</sup>C: 101 MHz) or 600 (<sup>1</sup>H: 600 MHz, <sup>13</sup>C: 151 MHz) spectrometer at 298 K. Data are presented as follows: chemical shift, multiplicity (s = singlet, d = doublet, t = triplet, q = quartet, sept = septet, m = multiplet, br = broad signal), integration, coupling constants J in hertz (Hz).

High resolution mass spectrometry (HRMS) was performed with a Thermo Fisher Scientific Q-Exactive MS System with electrospray ionization (ESI) method. Infrared spectra were recorded on a FT-IR spectrometer (Bruker ALPHA II) using a DLaTGS detector. Crystal data were collected on a Bruker D8 Venture diffractometer with graphite monochromated Cu K $\alpha$  ( $\lambda$  = 1.54178). Data reduction, scaling and absorption corrections were performed using SAINT (Bruker, V8.38A, 2013). The structure was solved with the XT structure solution program using the Intrinsic Phasing solution method and by using Olex2 as the graphical interface. The frames were integrated with the Bruker SAINT software package using a narrow-frame algorithm. Data were corrected for absorption effects using the empirical multiscan method (SADABS). The model was refined with the ShelXL program using Least Squares minimization. All non-hydrogen atoms were refined anisotropically. Hydrogen atoms were included in structure factor calculations. All hydrogen atoms were assigned to idealized geometric positions. A photoreaction instrument (300W, PL-DY1600, Beijing Precise Technology Co., Ltd.) equipped with a broad band LED lamp with the central wavenumber of 365 nm was used for the irradiation.

Commercial reagents were purchased from Energy Chemical, J&K, or TCI Chemical Co. and used as received. The abbreviation for the ligand is as follows: Dipp = 2,6-diisopropylphenyl. Compound **1a** was synthesized according to literature procedure<sup>S1</sup>. Note: Although we have not experienced any problems, cautions should be exercised when handling diazo reagents due to their potentially explosive nature, especially for large scale reactions.

## II. Experimental Details

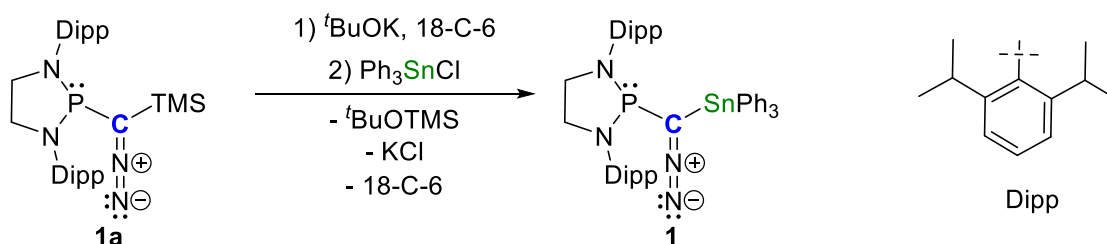

**Scheme 1.** Synthesis of **1**.

A solution of <sup>t</sup>BuOK (51 mg, 0.45 mmol) and 18-C-6 (143 mg, 0.55 mmol) in THF (4 mL) was added dropwise into a THF solution of **1a** (236 mg, 0.45 mmol) (3 mL) at -50 °C. After stirring for 4 h, a THF solution of Ph<sub>3</sub>SnCl (176 mg, 0.45 mmol) (5 mL) was added dropwise into the solution at -50 °C. After stirring for 30 min, all the volatiles were removed under vacuum, and the residue was extracted with 5 mL of toluene. The solvent was removed under vacuum; the residue was washed with 3 x 2 mL of *n*-hexane, affording **1** as a gray solid. (200 mg, 56%). Colorless crystals suitable for single-crystal X-ray analysis were obtained from a concentrated Et<sub>2</sub>O/*n*-pentane solution at -30 °C.

<sup>1</sup>H NMR (400 MHz, C<sub>6</sub>D<sub>6</sub>) δ (ppm) = 7.27 (m, 7H, <sup>Ph</sup>Ar-H), 7.19 (m, 5H, <sup>Ph</sup>Ar-H), 6.99 (m, 9H, <sup>Ph</sup>Ar-H), 4.20 (sept, <sup>3</sup>J<sub>H-H</sub> = 6.9 Hz, 2H, <sup>Dipp</sup>CH), 4.06 (m, 2H, CH<sub>2</sub>), 3.56 (m, 2H, <sup>Dipp</sup>CH), 3.22 (m, 2H, CH<sub>2</sub>), 1.40 (d, <sup>3</sup>J<sub>H-H</sub> = 6.9 Hz, 6H, <sup>Dipp</sup>CH<sub>3</sub>), 1.34 (d, <sup>3</sup>J<sub>H-H</sub> = 6.9 Hz, 6H, <sup>Dipp</sup>CH<sub>3</sub>), 1.24 (d, <sup>3</sup>J<sub>H-H</sub> = 6.9 Hz, 6H, <sup>Dipp</sup>CH<sub>3</sub>), 1.13 (d, <sup>3</sup>J<sub>H-H</sub> = 6.9 Hz, 6H, <sup>Dipp</sup>CH<sub>3</sub>).

<sup>13</sup>C{<sup>1</sup>H} NMR (101 MHz, C<sub>6</sub>D<sub>6</sub>) δ (ppm) = 149.7 (Ar-C), 148.2 (Ar-C), 138.4 (d, <sup>2</sup>J<sub>P-C</sub> = 13.5 Hz, P-N-C<sub>Ar</sub>), 137.1 (Ar-C), 129.4 (Ar-C), 129.1 (Ar-C), 124.8 (Ar-C), 124.9 (Ar-C), 54.9 (d, <sup>2</sup>J<sub>P-C</sub> = 7.3 Hz, NCH<sub>2</sub>), 29.8 (d, <sup>1</sup>J<sub>P-C</sub> = 154.3 Hz, CN<sub>2</sub>), 29.0 (d, <sup>4</sup>J<sub>P-C</sub> = 9.4 Hz, CHMe<sub>2</sub>), 28.1 (CH<sub>3</sub>), 25.8 (CH<sub>3</sub>), 25.7 (CH<sub>3</sub>), 24.2 (d, <sup>5</sup>J<sub>P-C</sub> = 2.7 Hz, <sup>Dipp</sup>CH<sub>3</sub>), 23.0 (CH<sub>3</sub>).

<sup>31</sup>P NMR (162 MHz, C<sub>6</sub>D<sub>6</sub>) δ (ppm) = 121.1 (<sup>2</sup>J<sup>19</sup><sub>Sn-P</sub> = 301.4 Hz, <sup>2</sup>J<sup>117</sup><sub>Sn-P</sub> = 287.6 Hz).

<sup>119</sup>Sn NMR (149 MHz, C<sub>6</sub>D<sub>6</sub>) δ (ppm) = -97.3 (d, <sup>2</sup>J<sub>P-Sn</sub> = 301.4 Hz).

HRMS (ESI) [M+H]<sup>+</sup> C<sub>45</sub>H<sub>54</sub>N<sub>4</sub>PSn<sup>+</sup>: calc. 801.31026, found. 801.31462 m/z.

IR (ATR, neat): 3055, 2960, 2867, 1975 (N=N stretching), 1455, 1426, 1321, 1257, 1072, 800, 726, 697, 650, 555, 446 cm<sup>-1</sup>.

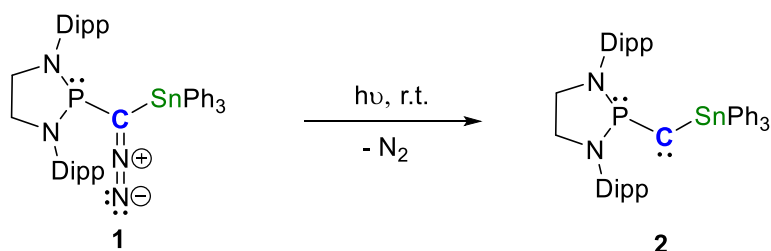

**Scheme 2.** Synthesis of **2**.

**1** (18 mg, 0.02 mmol) was placed in a J-Young tube, and then dry C<sub>6</sub>D<sub>6</sub> (0.6 mL) was added at room temperature. The NMR tube was subjected to 352 nm broadband irradiation by LED lamp and monitored by <sup>1</sup>H NMR spectroscopy. After 2 h, the reaction was completed, and the volatiles were removed under vacuum. The residue was washed with 0.5 mL of *n*-pentane and dried under vacuum to afford **2** as a white powder

(88%, 15 mg). Colorless crystals of **2** suitable for single-crystal X-ray diffraction were grown by evaporation of a C<sub>6</sub>D<sub>6</sub>/*n*-pentane mixture solution (C<sub>6</sub>D<sub>6</sub>: 0.2 mL/*n*-pentane: 0.4 mL) at -30 °C.

<sup>1</sup>H NMR (400 MHz, C<sub>6</sub>D<sub>6</sub>) δ (ppm) = 7.46 (m, 6H, <sup>Ph</sup>Ar-H), 7.18 (t, <sup>3</sup>J<sub>H-H</sub> = 7.7 Hz, 2H, <sup>Dipp</sup>Ar-H), 7.10 (m, 13H, Ar-H), 3.56 (sept, <sup>3</sup>J<sub>H-H</sub> = 7.1 Hz, 4H, <sup>Dipp</sup>CH), 3.27 (d, <sup>3</sup>J<sub>H-H</sub> = 6.9 Hz, 4H, CH<sub>2</sub>), 1.29 (d, <sup>3</sup>J<sub>H-H</sub> = 6.9 Hz, <sup>Dipp</sup>CH<sub>3</sub>), 1.24 (d, <sup>3</sup>J<sub>H-H</sub> = 7.0 Hz, <sup>Dipp</sup>CH<sub>3</sub>).

<sup>13</sup>C {<sup>1</sup>H} NMR (101 MHz, C<sub>6</sub>D<sub>6</sub>) δ (ppm) 148.3 (d, <sup>3</sup>J<sub>P-C</sub> = 2.1 Hz, Sn-*o*-C<sub>Ar</sub>), 142.2 (d, <sup>2</sup>J<sub>P-C</sub> = 11.5 Hz, P-N-C<sub>Ar</sub>), 136.8 (Ar-C), 134.5 (d, <sup>3</sup>J<sub>P-C</sub> = 4.4 Hz, P-N-C-C<sub>Ar</sub>), 124.3 (Ar-C), 49.6 (d, <sup>1</sup>J<sub>P-C</sub> = 44.6 Hz, PCSn), 47.5 (d, <sup>2</sup>J<sub>P-C</sub> = 9.9 Hz, NCH<sub>2</sub>), 29.1 (CH<sub>3</sub>), 24.4 (CH<sub>3</sub>), 24.3 (CH<sub>3</sub>).

<sup>31</sup>P NMR (162 MHz, C<sub>6</sub>D<sub>6</sub>) δ (ppm) = 10.2 (<sup>2</sup>J<sup>19</sup><sub>Sn-P</sub> = 317.5 Hz, <sup>2</sup>J<sup>117</sup><sub>Sn-P</sub> = 303.5 Hz).

<sup>119</sup>Sn NMR (149 MHz, C<sub>6</sub>D<sub>6</sub>) δ (ppm) = -102.2 (d, <sup>2</sup>J<sub>P-Sn</sub> = 317.5 Hz).

HRMS (ESI) [M+H]<sup>+</sup> C<sub>45</sub>H<sub>54</sub>N<sub>2</sub>P<sup>+</sup>Sn<sup>+</sup>: calc. 773.30411, found. 773.30408 m/z.

IR (ATR, neat): 3059, 2957, 2923, 2865, 1460, 1427, 1320, 1255, 1073, 964, 854, 801, 726, 697, 445 cm<sup>-1</sup>.

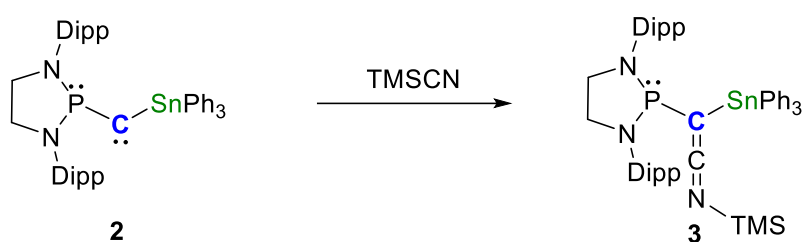

**Scheme 3.** Synthesis of **3**.

**2** (15 mg, 0.02 mmol) in 1 mL of THF was added in TMSCN (2 mg, 0.02 mmol). After stirring for 5 min at room temperature, the solvent was removed under reduced pressure. The residue was washed with 0.5 mL of *n*-pentane and then dried under vacuum to afford **3** as a slightly yellow solid (15 mg, 88%). Colorless single crystals of **3** suitable for X-ray diffraction were obtained from a saturated solution of **3** in Et<sub>2</sub>O at -30 °C.

<sup>1</sup>H NMR (400 MHz, C<sub>6</sub>D<sub>6</sub>) δ (ppm) = 7.36 (m, 8H, <sup>Dipp/Ph</sup>Ar-H), 7.26 (m, 4H, <sup>Dipp/Ph</sup>Ar-H), 7.07 (<sup>Dipp/Ph</sup>Ar-H), 6.99 (<sup>Dipp/Ph</sup>Ar-H), 4.22 (sept, <sup>3</sup>J<sub>H-H</sub> = 6.9 Hz, 2H, <sup>Dipp</sup>CH), 4.03 (m, 2H, CH<sub>2</sub>), 3.76 (m, 2H, <sup>Dipp</sup>CH), 3.36 (m, 2H, CH<sub>2</sub>), 1.39 (d, <sup>3</sup>J<sub>H-H</sub> = 6.9 Hz, 6H, <sup>Dipp</sup>CH<sub>3</sub>), 1.38 (d, <sup>3</sup>J<sub>H-H</sub> = 6.9 Hz, 6H, <sup>Dipp</sup>CH<sub>3</sub>), 1.30 (d, <sup>3</sup>J<sub>H-H</sub> = 6.9 Hz, 6H, <sup>Dipp</sup>CH<sub>3</sub>), 1.19 (d, <sup>3</sup>J<sub>H-H</sub> = 6.9 Hz, 6H, <sup>Dipp</sup>CH<sub>3</sub>), 0.05 (s, 9H, TMS-H).

<sup>13</sup>C {<sup>1</sup>H} NMR (101 MHz, C<sub>6</sub>D<sub>6</sub>) δ (ppm) = 150.0 (d, <sup>3</sup>J<sub>P-C</sub> = 2.0 Hz, Sn-*o*-C<sub>Ar</sub>), 149.7 (d, <sup>2</sup>J<sub>P-C</sub> = 5.4 Hz, P-N-C<sub>Ar</sub>), 140.0 (d, <sup>2</sup>J<sub>P-C</sub> = 13.8 Hz, P-N-C<sub>Ar</sub>, P-C-C), 139.2 (d, <sup>3</sup>J<sub>P-C</sub> = 2.8 Hz, P-N-C-C<sub>Ar</sub>), 137.4 (Ar-C), 128.9 (Ar-C), 128.7 (Ar-C), 124.8 (d, <sup>3</sup>J<sub>P-C</sub> = 6.2 Hz, P-N-C-C<sub>A</sub>), 55.5 (d, <sup>2</sup>J<sub>P-C</sub> = 8.0 Hz, NCH<sub>2</sub>), 28.9 (d, <sup>4</sup>J<sub>P-C</sub> = 9.2 Hz, CHMe<sub>2</sub>), 28.2 (CH<sub>3</sub>), 26.1 (CH<sub>3</sub>), 25.9 (CH<sub>3</sub>), 24.7 (CH<sub>3</sub>), 24.3 (d, <sup>5</sup>J<sub>P-C</sub> = 3.2 Hz, <sup>Dipp</sup>CH<sub>3</sub>), 23.2 (d, <sup>1</sup>J<sub>P-C</sub> = 133.1 Hz, P-C), 0.4 (TMS-C).

<sup>31</sup>P NMR (162 MHz, C<sub>6</sub>D<sub>6</sub>) δ (ppm) = 112.6 (<sup>2</sup>J<sup>119</sup><sub>Sn-P</sub> = 352.7 Hz, <sup>2</sup>J<sup>117</sup><sub>Sn-P</sub> = 339.6 Hz).

<sup>119</sup>Sn NMR (149 MHz, C<sub>6</sub>D<sub>6</sub>), δ (ppm) = -91.6 (<sup>2</sup>J<sub>P-Sn</sub> = 352.7 Hz).

HRMS (ESI) [M+H]<sup>+</sup> C<sub>49</sub>H<sub>63</sub>N<sub>3</sub>PSi<sup>+</sup>Sn<sup>+</sup>: calc. 872.35454, found. 872.35419 m/z.

IR (ATR, neat): 3055, 2960, 2867, 2056 (CCN stretching), 1428, 1252, 1105, 1071, 837, 803, 726, 696, 659, 599, 568, 552, 506, 446 cm<sup>-1</sup>.

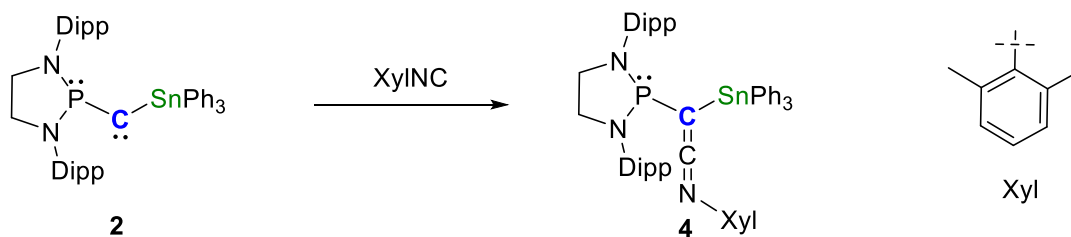

**Scheme 4.** Synthesis of **4**.

A mixture of **2** (15 mg, 0.02 mmol) and 2,6-xylyl isocyanide (2.6 mg, 0.02 mmol) were dissolved in  $C_6D_6$  and stirred for 5 min at room temperature. All volatiles were removed under vacuum, and the residue was washed with 0.5 mL of cooled *n*-pentane and then dried under vacuum, affording **4** as a white solid (16 mg, 91%). Single crystals (colorless) suitable for X-ray diffraction of **4** were obtained from a concentrated  $Et_2O$  solution at  $-30\text{ }^\circ\text{C}$ .

$^1\text{H}$  NMR (400 MHz,  $C_6D_6$ )  $\delta$  (ppm) = 7.41 (m, 5H,  $^{Ph}Ar\text{-H}$ ), 7.28 (t,  $^3J_{\text{H-H}} = 7.6$  Hz, 2H,  $^{Dipp}Ar\text{-H}$ ), 7.21 (m, 4H, Ar-H), 7.04 (m, 4H, Ar-H), 6.96 (m, 6H, Ar-H), 6.78 (s, 3H,  $^{Ph}Ar\text{-H}$ ), 4.15 (m, 2H,  $\text{CH}_2$ ), 4.11 (m, 2H,  $^{Dipp}CH$ ), 3.61 (m, 2H,  $^{Dipp}CH$ ), 3.32 (m, 2H,  $\text{NCH}_2$ ), 2.01 (s, 6H,  $^{Xyl}CH_3$ ), 1.29 (d,  $^3J_{\text{H-H}} = 6.8$  Hz, 6H,  $^{Dipp}CH_3$ ), 1.26 (d,  $^3J_{\text{H-H}} = 6.9$  Hz, 6H,  $^{Dipp}CH_3$ ), 1.16 (d,  $^3J_{\text{H-H}} = 6.9$  Hz, 6H,  $^{Dipp}CH_3$ ), 1.08 (d,  $^3J_{\text{H-H}} = 6.8$  Hz, 6H,  $^{Dipp}CH_3$ ).

$^{13}\text{C}\{^1\text{H}\}$  NMR (101 MHz,  $C_6D_6$ )  $\delta$  (ppm) 160.0 (d,  $^3J_{\text{P-C}} = 4.5$  Hz,  $\text{Sn-}o\text{-C}_{Ar}$ ), 150.0 (d,  $^2J_{\text{P-C}} = 2.5$  Hz,  $\text{P-N-C}_{Ar}$ ), 149.1 (Ar-C), 139.4 (d,  $^2J_{\text{P-C}} = 13.5$  Hz,  $\text{P-C-C}$ ), 138.9 (d,  $^3J_{\text{P-C}} = 3.7$  Hz,  $\text{P-N-C-C}_{Ar}$ ), 138.1 (Ar-C), 137.5 (Ar-C), 137.4 (Ar-C), 137.2 (Ar-C), 137.1 (Ar-C), 131.0 (Ar-C), 129.1 (Ar-C), 128.9 (Ar-C), 127.5 (Ar-C), 124.5 (Ar-C), 55.6 (d,  $^2J_{\text{P-C}} = 8.0$  Hz,  $\text{NCH}_2$ ), 40.8 (d,  $^1J_{\text{P-C}} = 138.6$  Hz,  $\text{PC}$ ), 28.9 (d,  $^4J_{\text{P-C}} = 9.1$  Hz,  $\text{CHMe}_2$ ), 28.7 ( $\text{CH}_3$ ), 25.9 ( $\text{CH}_3$ ), 24.4 ( $\text{CH}_3$ ), 24.1 (d,  $^5J_{\text{P-C}} = 2.8$  Hz,  $^{Dipp}CH_3$ ), 19.1 ( $\text{CH}_3$ ).

$^{31}\text{P}$  NMR (162 MHz,  $C_6D_6$ )  $\delta$  (ppm) = 114.7 ( $^2J^{19}\text{Sn-P} = 362.9$  Hz,  $^2J^{117}\text{Sn-P} = 350.1$ ).

$^{119}\text{Sn}$  NMR (149 MHz,  $C_6D_6$ )  $\delta$  (ppm) =  $-106.5$  (d,  $^2J_{\text{P-Sn}} = 362.9$  Hz).

HRMS (ESI)  $[\text{M}+\text{H}]^+$   $\text{C}_{54}\text{H}_{63}\text{N}_3\text{PSn}^+$ : calc. 904.37761, found. 904.37836  $m/z$ .

IR (ATR, neat): 3046, 2960, 2865, 1985 (CCN stretching), 1428, 1253, 1073, 765, 725, 697, 564, 505, 456, 444  $\text{cm}^{-1}$ .

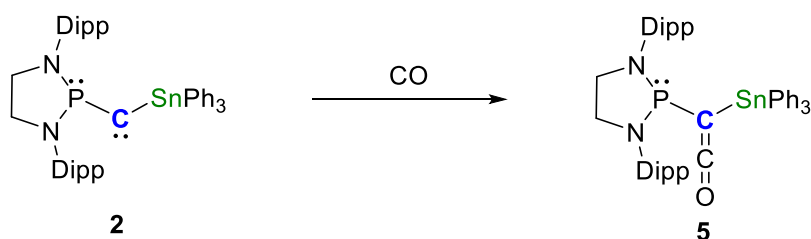

**Scheme 5.** Synthesis of **5**.

**2** (15 mg, 0.02 mmol) was charged into a 5 mL Schlenk flask, and then 1 mL of  $C_6D_6$  was added. The flask was freeze-pumped and backfilled with CO gas (3 atm) 3 times. After stirring for 10 min, the solvents were removed under vacuum, and the residue was washed with 0.5 mL of *n*-pentane and dried under vacuum, affording **5** as a white solid (12 mg, 77%). Colorless single crystals of **5** suitable for X-ray diffraction were obtained by slow diffusion of pentane into a saturated solution of **5** in  $Et_2O$  at  $-30\text{ }^\circ\text{C}$ .

$^1\text{H}$  NMR (400 MHz,  $C_6D_6$ ):  $\delta$  (ppm) = 7.30 (m, 11H, Ar-H), 7.06 (m, 4H, Ar-H), 6.96 (m, 6H, Ar-H), 4.12 (sept,  $^3J_{\text{H-H}} = 6.9$  Hz, 2H,  $^{Dipp}CH$ ), 3.98 (m, 2H,  $\text{NCH}_2$ ), 3.52 (m, 2H,  $^{Dipp}CH$ ), 3.22 (m, 2H,  $\text{NCH}_2$ ), 1.40

(d,  $^3J_{\text{H-H}} = 6.9$  Hz, 6H,  $\text{DippCH}_3$ ), 1.33 (d,  $^3J_{\text{H-H}} = 6.9$  Hz, 6H,  $\text{DippCH}_3$ ), 1.22 (d,  $^3J_{\text{H-H}} = 6.9$  Hz, 6H,  $\text{DippCH}_3$ ), 1.10 (d,  $^3J_{\text{H-H}} = 6.9$  Hz, 6H,  $\text{DippCH}_3$ ).

$^{13}\text{C}\{^1\text{H}\}$  NMR (101 MHz,  $\text{C}_6\text{D}_6$ )  $\delta$  (ppm) = 169.4 (d,  $^2J_{\text{P-C}} = 6.5$  Hz, CCO), 150.1 (d,  $^2J_{\text{P-C}} = 3.0$  Hz, P-N- $\text{C}_{\text{Ar}}$ ), 149.1 (Ar-C), 138.4 (Ar-C), 137.4 (d,  $^3J_{\text{P-C}} = 2.9$  Hz, P-N-C- $\text{C}_{\text{Ar}}$ ), 137.0 (Ar-C), 124.9 (Ar-C), 124.6 (Ar-C), 55.2 (d,  $^2J_{\text{P-C}} = 8.2$  Hz,  $\text{NCH}_2$ ), 31.0 (d,  $^1J_{\text{P-C}} = 175.0$  Hz, PC), 29.0 (d,  $^4J_{\text{P-C}} = 9.6$  Hz,  $\text{CHMe}_2$ ), 28.8 ( $\text{CH}_3$ ).

$^{31}\text{P}$  NMR (162 MHz,  $\text{C}_6\text{D}_6$ )  $\delta$  (ppm) = 117.4 ( $^2J^{119}_{\text{Sn-P}} = 302.6$  Hz,  $^2J^{117}_{\text{Sn-P}} = 288.4$ ).

$^{119}\text{Sn}$  NMR (149 MHz,  $\text{C}_6\text{D}_6$ ),  $\delta$  (ppm) = 100.1 (d,  $^2J_{\text{P-Sn}} = 302.6$  Hz)

HRMS (ESI)  $[\text{M}+\text{H}]^+$   $\text{C}_{46}\text{H}_{54}\text{ON}_2\text{PSn}^+$ : calc. 801.29902, found. 801.29961 m/z.

IR (ATR, neat): 3064, 2960, 2923, 2866, 2049 (CCO stretching), 1428, 1253, 1069, 799, 727, 697, 580, 509, 438  $\text{cm}^{-1}$ .

### III. NMR Spectra

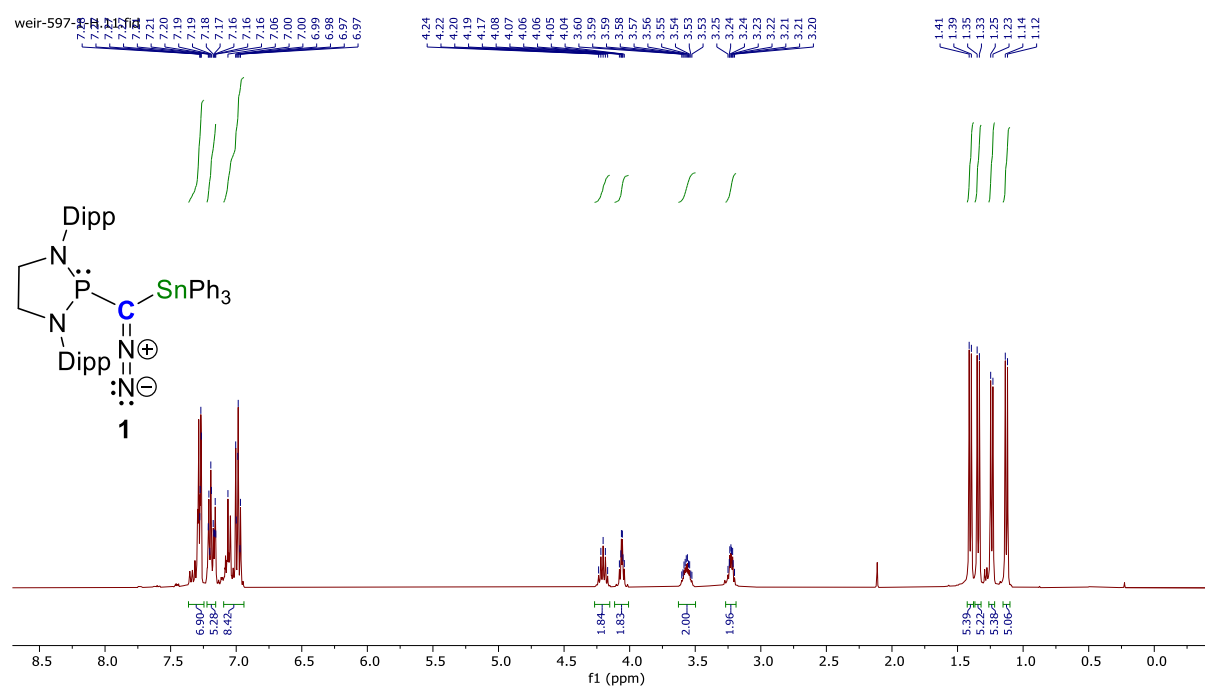

Figure S1. <sup>1</sup>H NMR spectrum of **1** (400 MHz, C<sub>6</sub>D<sub>6</sub>).

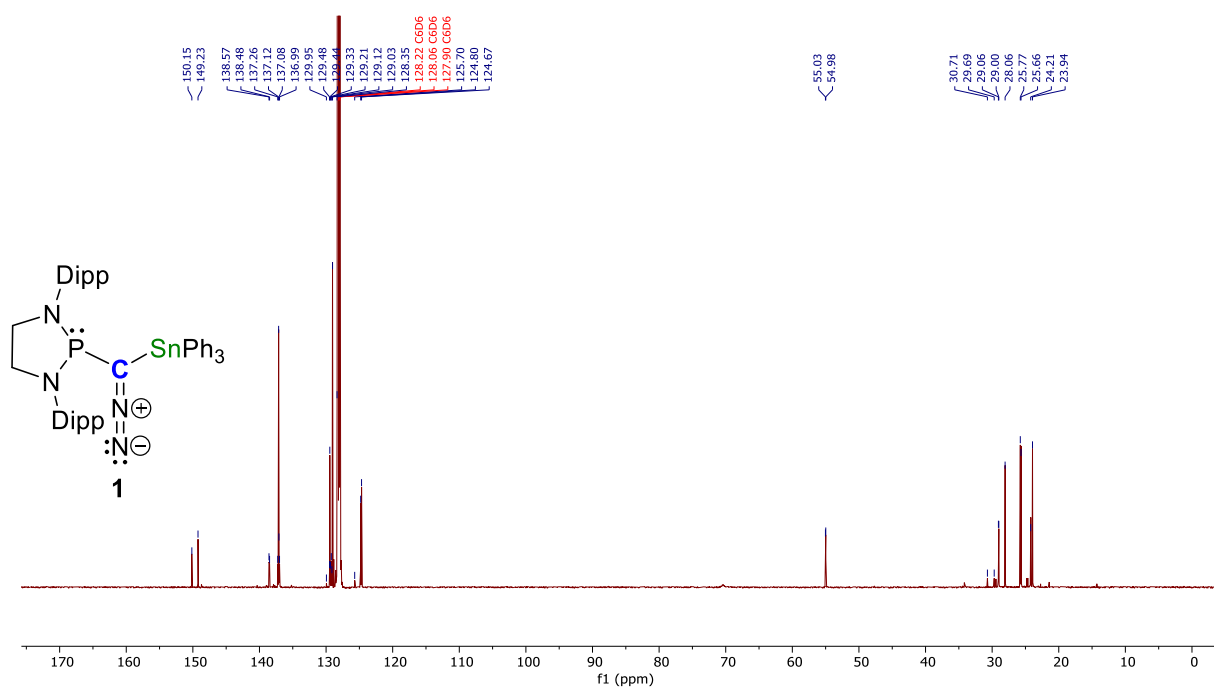

Figure S2. <sup>13</sup>C{<sup>1</sup>H} NMR spectrum of **1** (101 MHz, C<sub>6</sub>D<sub>6</sub>).

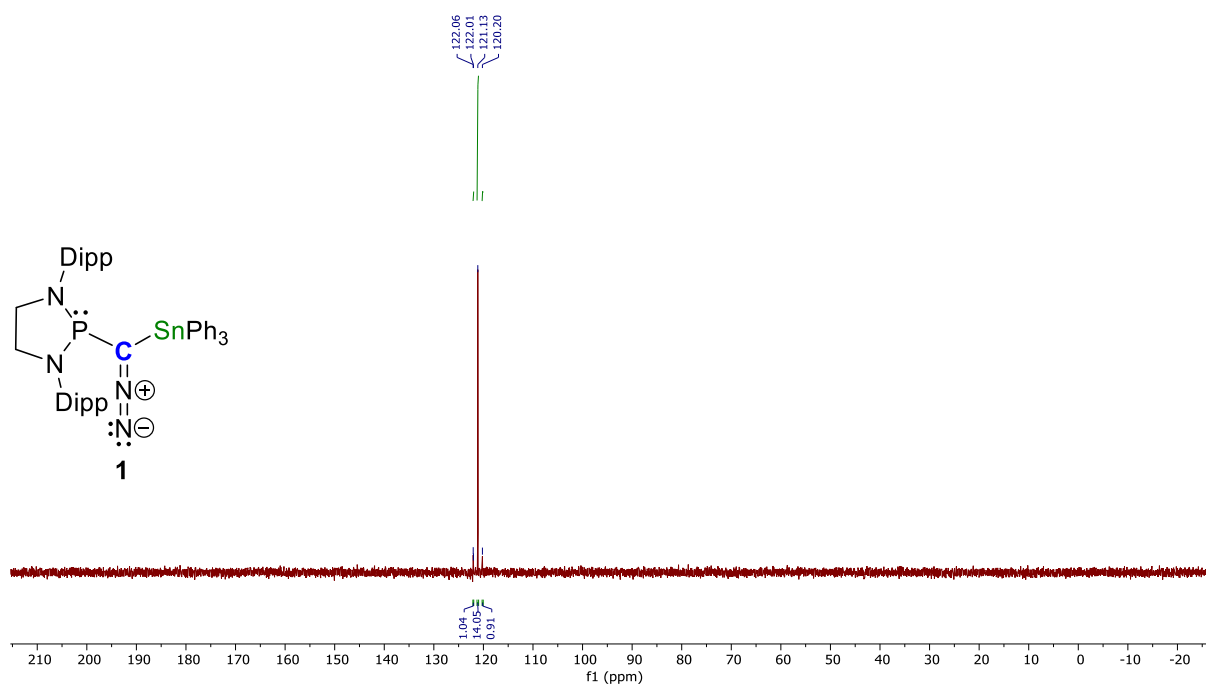

**Figure S3.** <sup>31</sup>P NMR spectrum of **1** (162 MHz, C<sub>6</sub>D<sub>6</sub>).

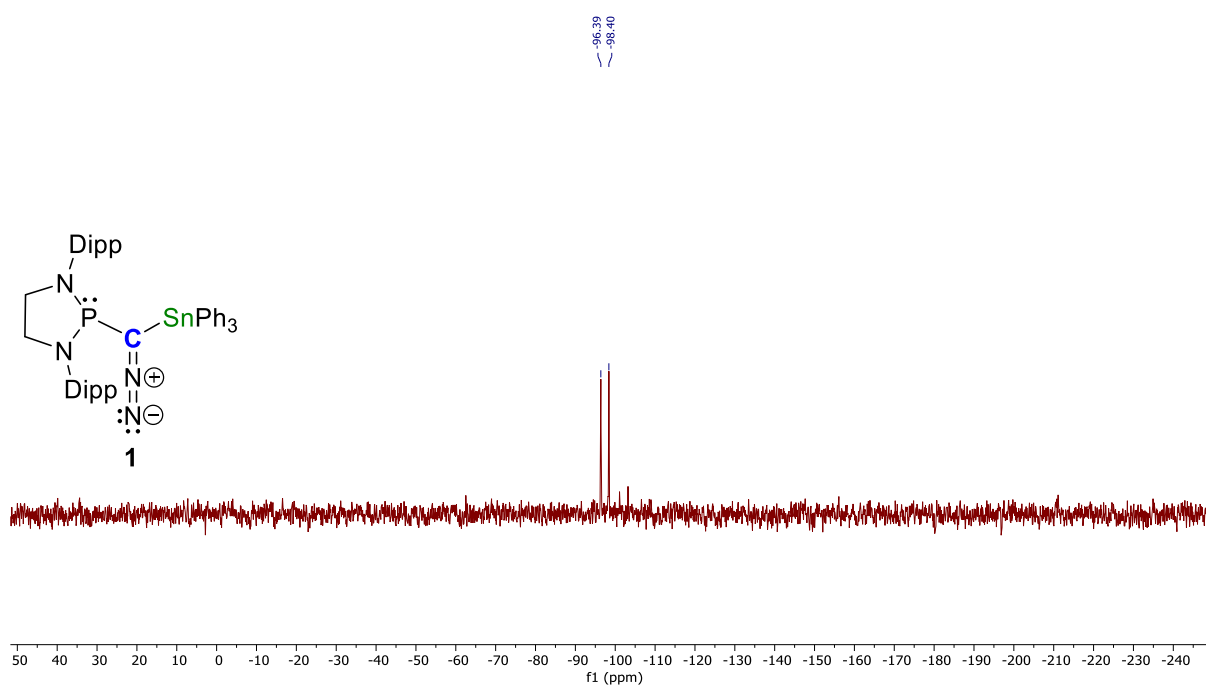

**Figure S4.** <sup>119</sup>Sn NMR spectrum of **1** (149 MHz, C<sub>6</sub>D<sub>6</sub>).



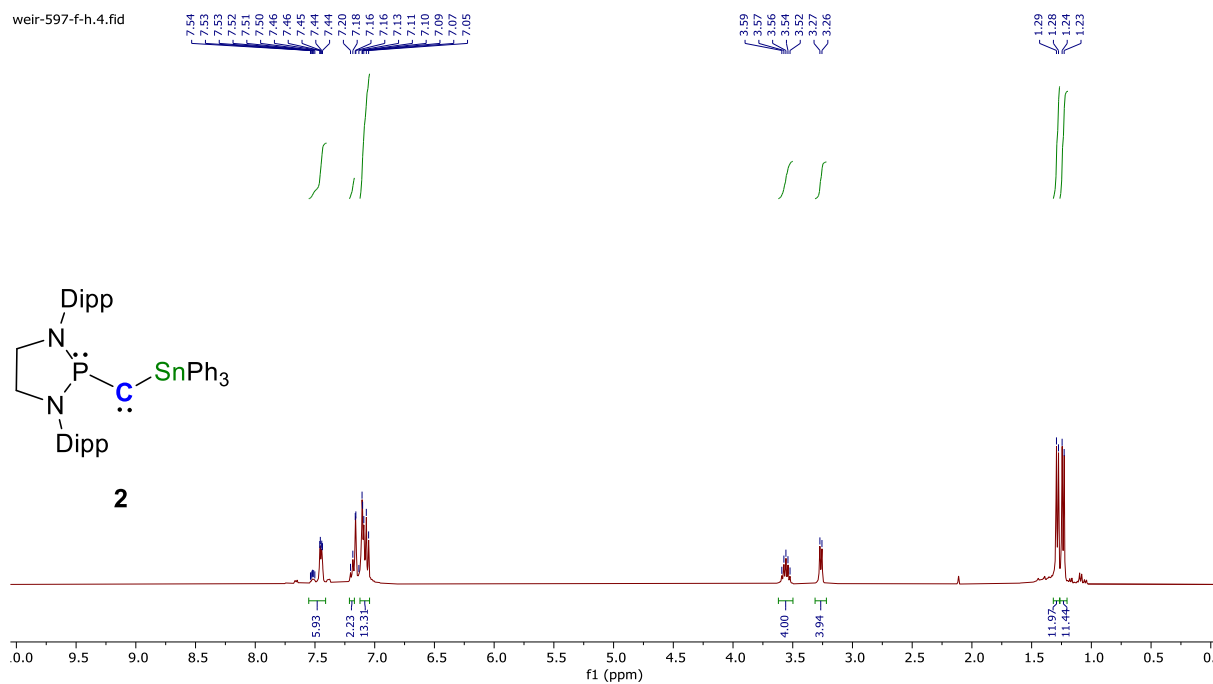

**Figure S5.**  $^1\text{H}$  NMR spectrum of **2** (400 MHz,  $\text{C}_6\text{D}_6$ ).

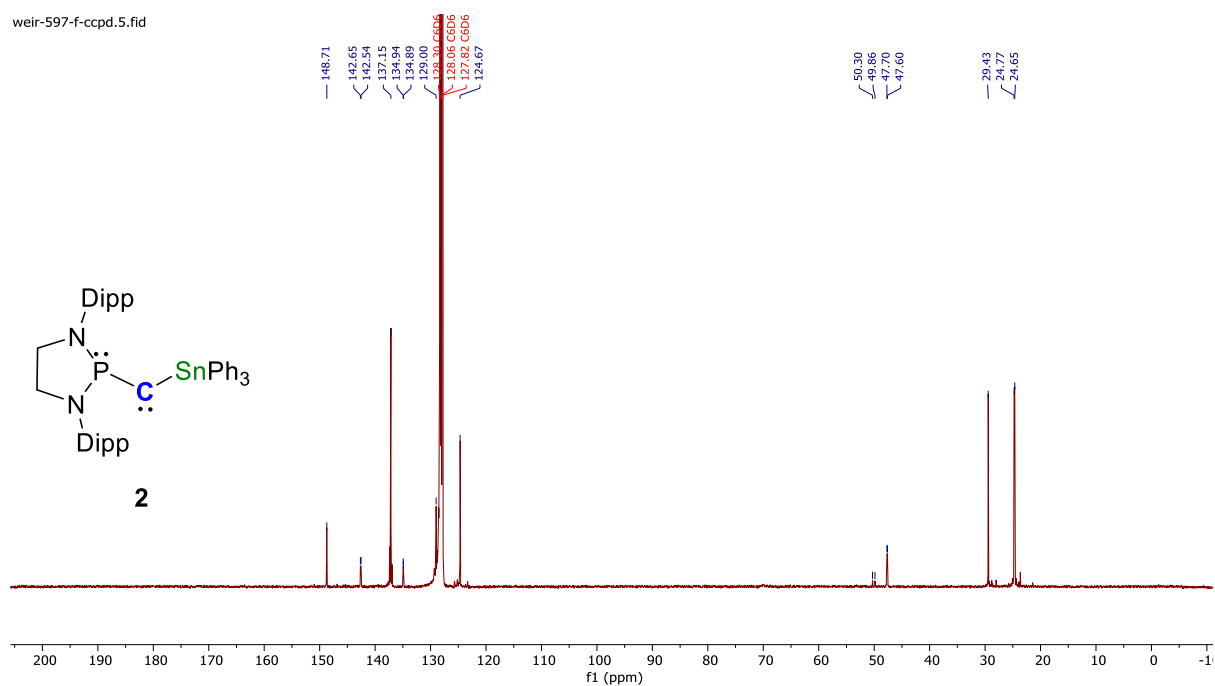

**Figure S6.**  $^{13}\text{C}\{^1\text{H}\}$  NMR spectrum of **2** (101 MHz,  $\text{C}_6\text{D}_6$ ).

weir-597-f-p.1.fid

11.22  
11.17  
10.27  
10.23  
9.28

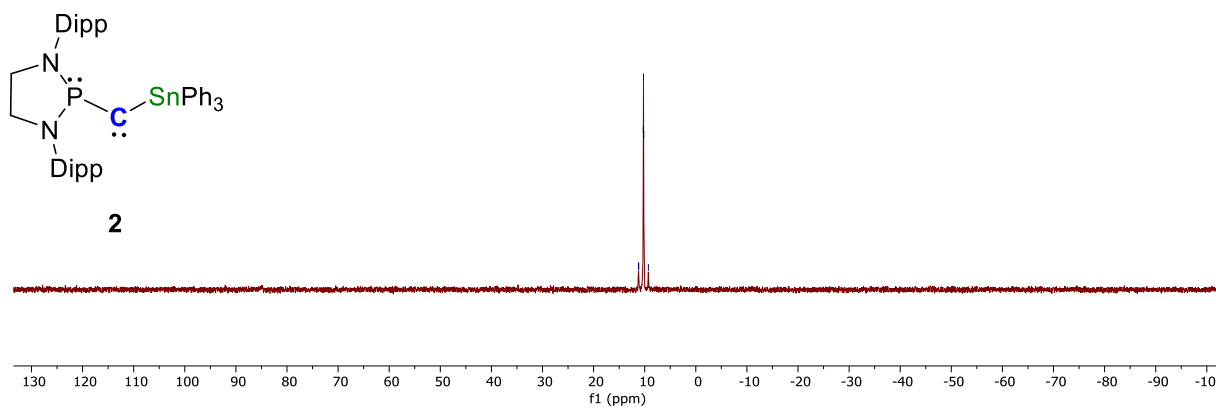

**Figure S7.**  $^{31}\text{P}$  NMR spectrum of **2** (162 MHz,  $\text{C}_6\text{D}_6$ ).

hcp2-220423.1.fid  
hcp1

-101.11  
-103.24

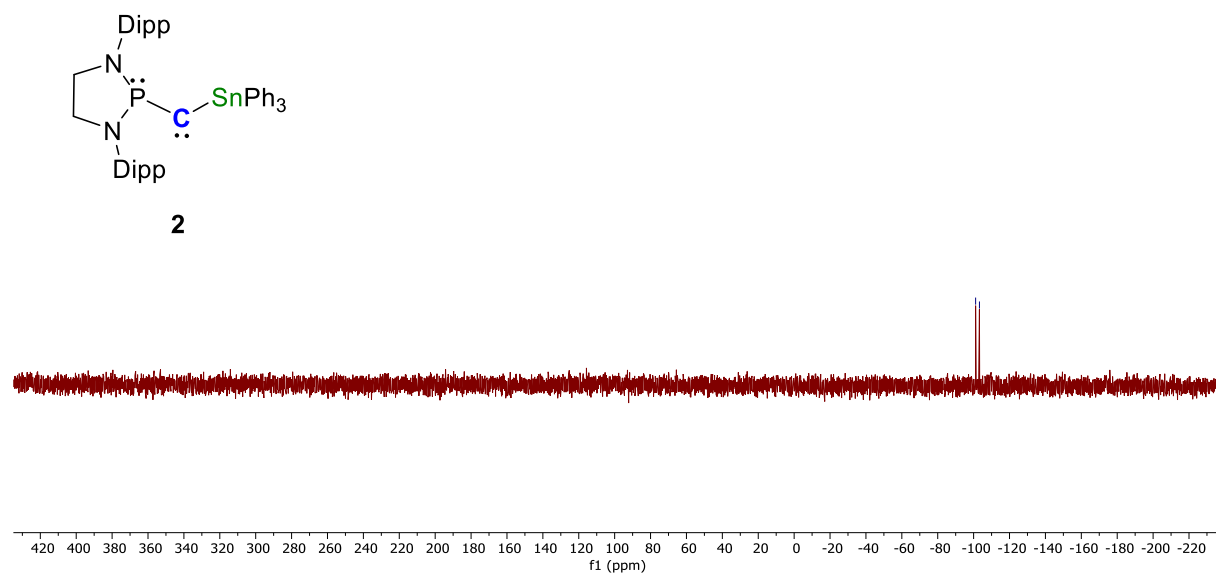

**Figure S8.**  $^{119}\text{Sn}$  NMR spectrum of **2** (149 MHz,  $\text{C}_6\text{D}_6$ ).

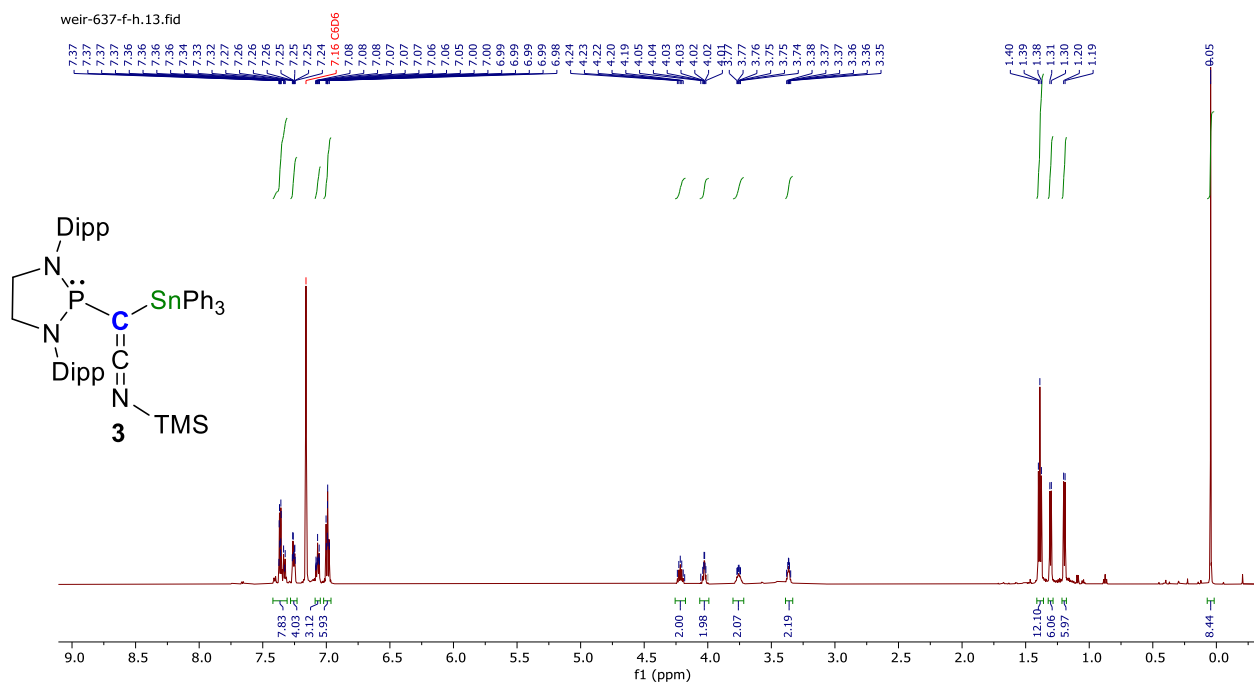

Figure S9. <sup>1</sup>H NMR spectrum of **3** (400 MHz, C<sub>6</sub>D<sub>6</sub>).

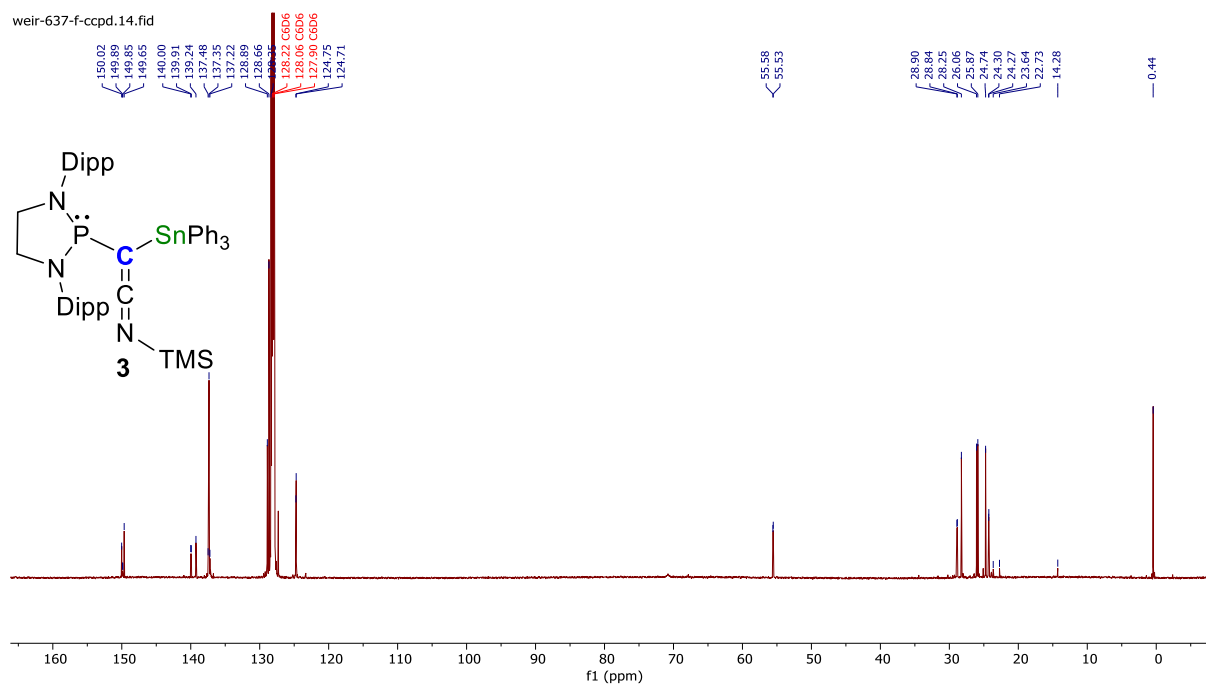

Figure S10. <sup>13</sup>C{<sup>1</sup>H} NMR spectrum of **3** (101 MHz, C<sub>6</sub>D<sub>6</sub>).

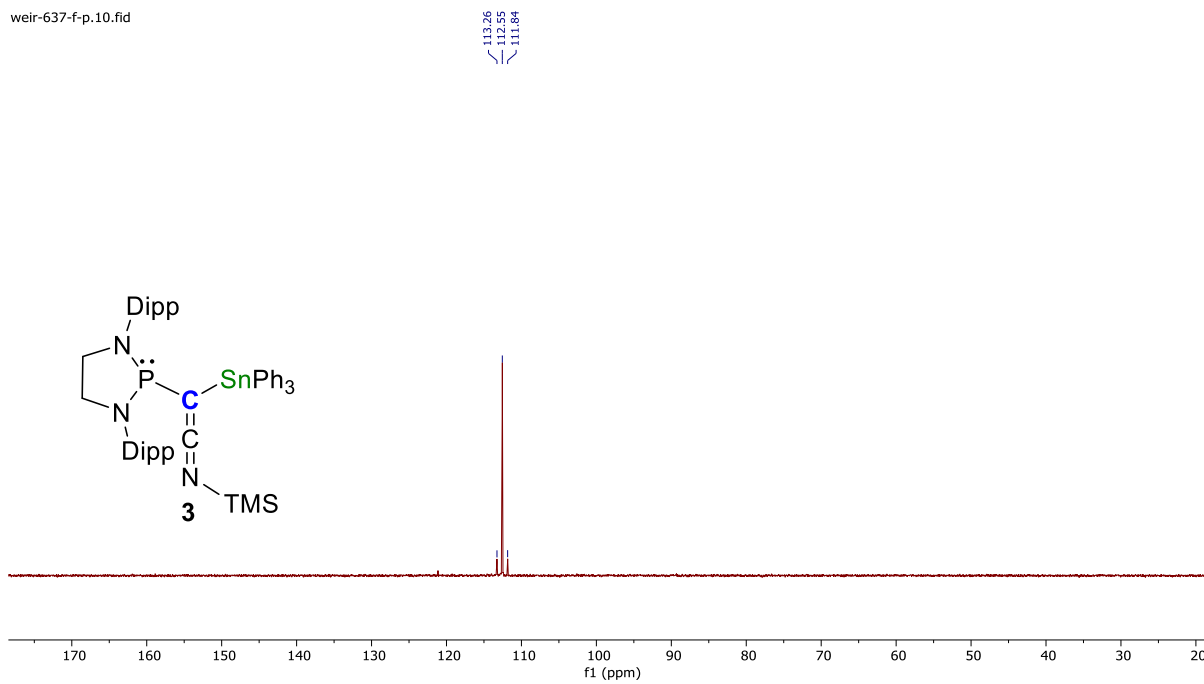

Figure S11.  $^{31}\text{P}$  NMR spectrum of **3** (162 MHz,  $\text{C}_6\text{D}_6$ ).

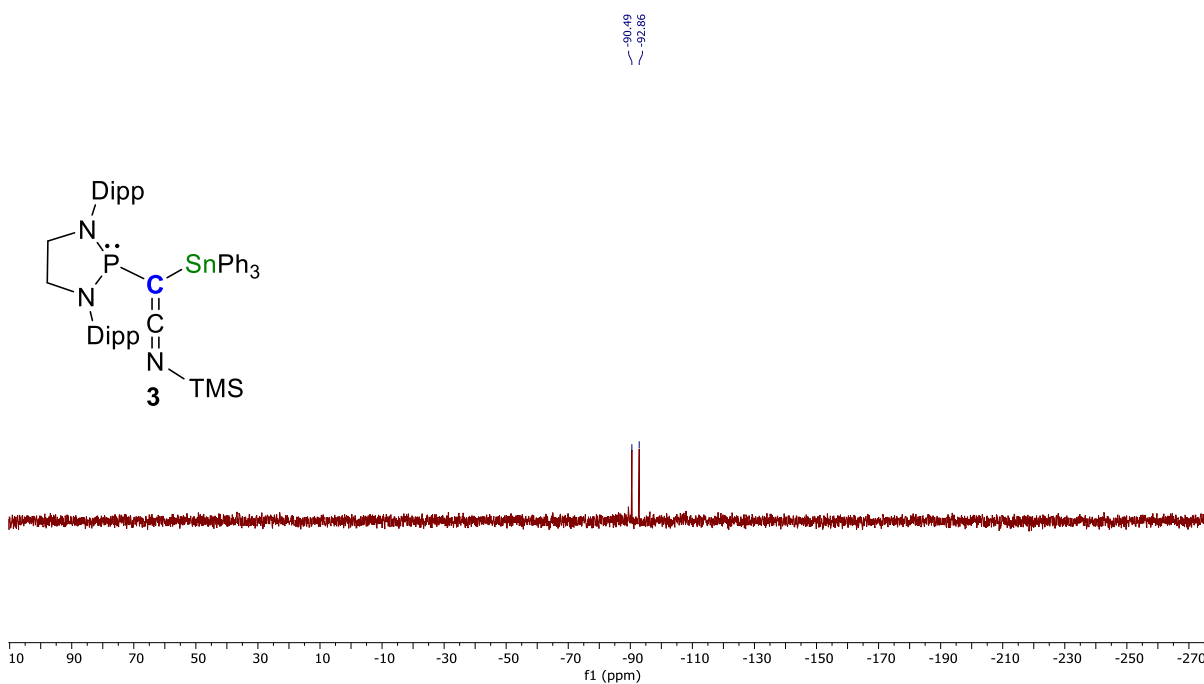

Figure S12.  $^{119}\text{Sn}$  NMR spectrum of **3** (149 MHz,  $\text{C}_6\text{D}_6$ ).

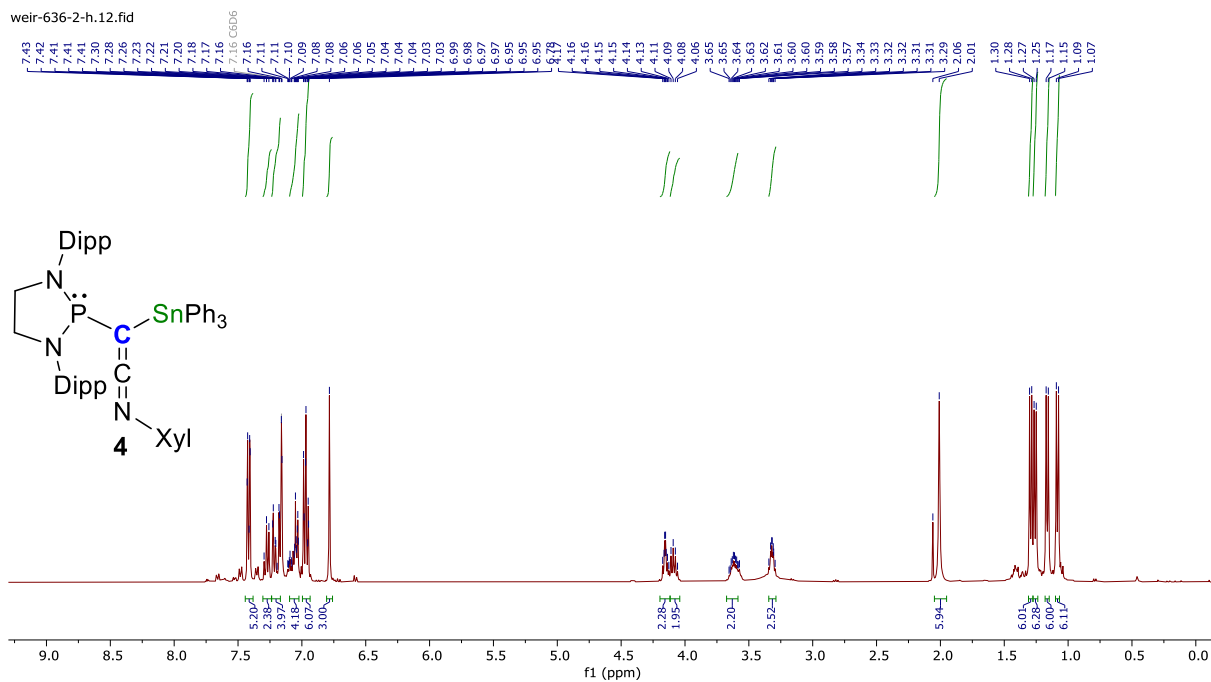

Figure S13  $^1\text{H}$  NMR spectrum of **4** (400 MHz,  $\text{C}_6\text{D}_6$ ).

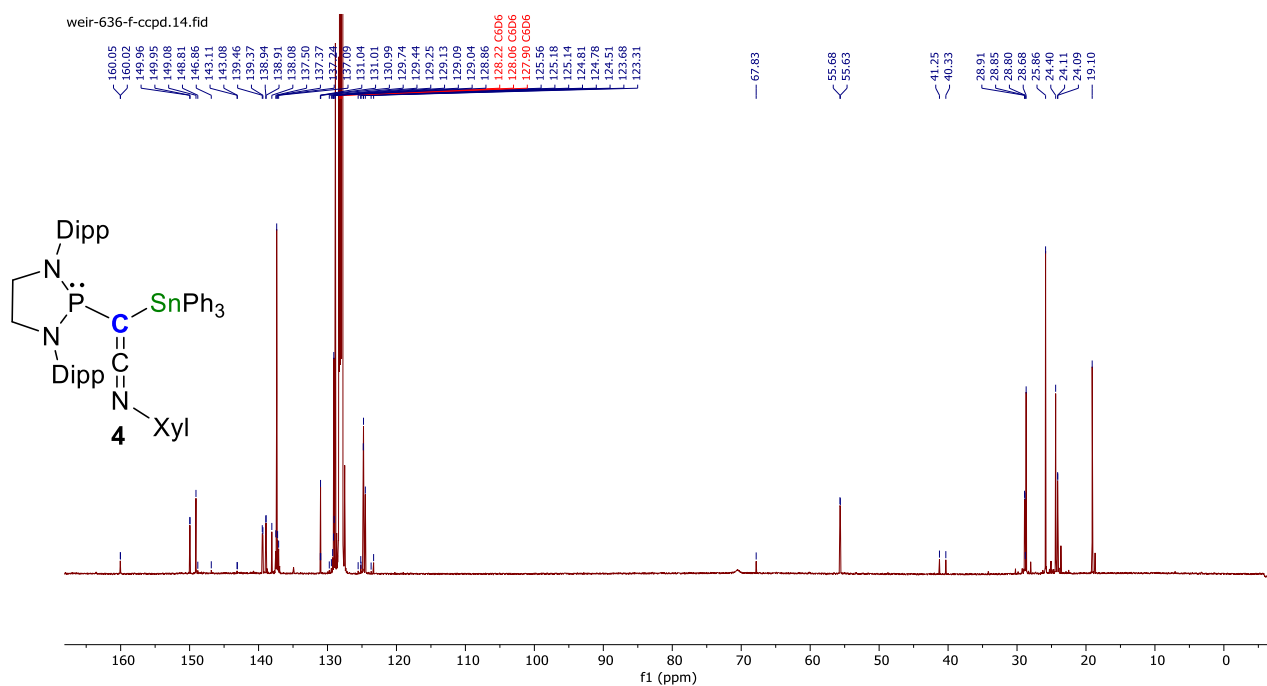

Figure S14.  $^{13}\text{C}\{^1\text{H}\}$  NMR spectrum of **4** (101 MHz,  $\text{C}_6\text{D}_6$ ).

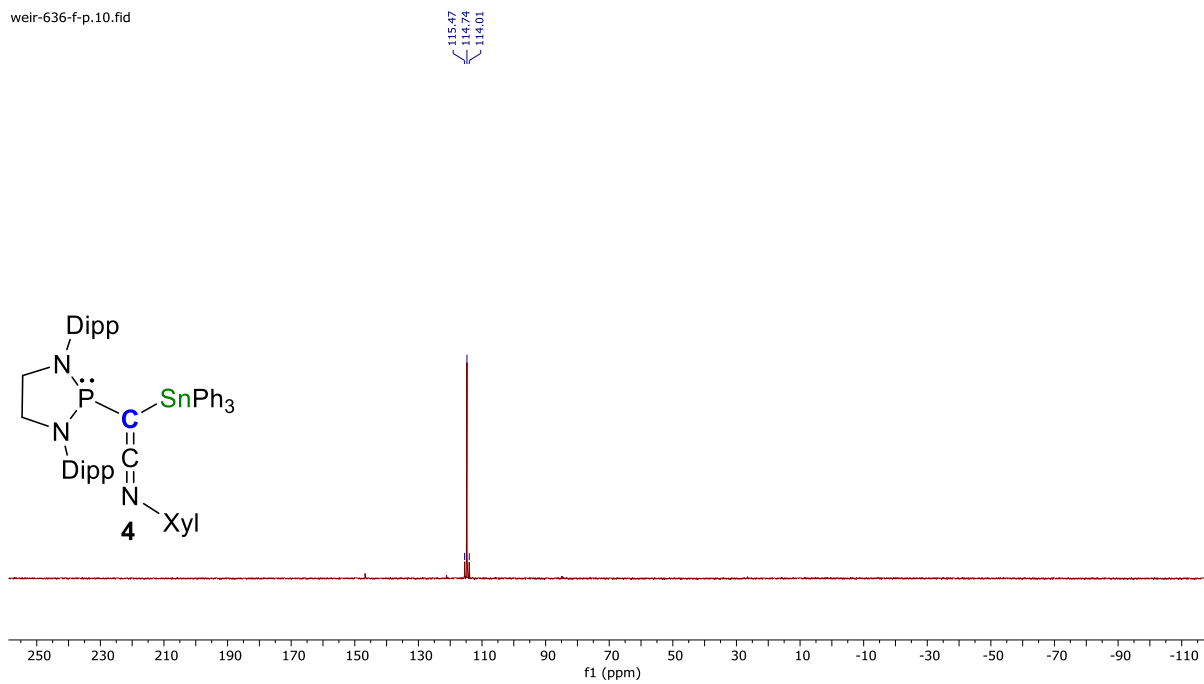

Figure S15.  $^{31}\text{P}$  NMR spectrum of 4 (162 MHz,  $\text{C}_6\text{D}_6$ ).

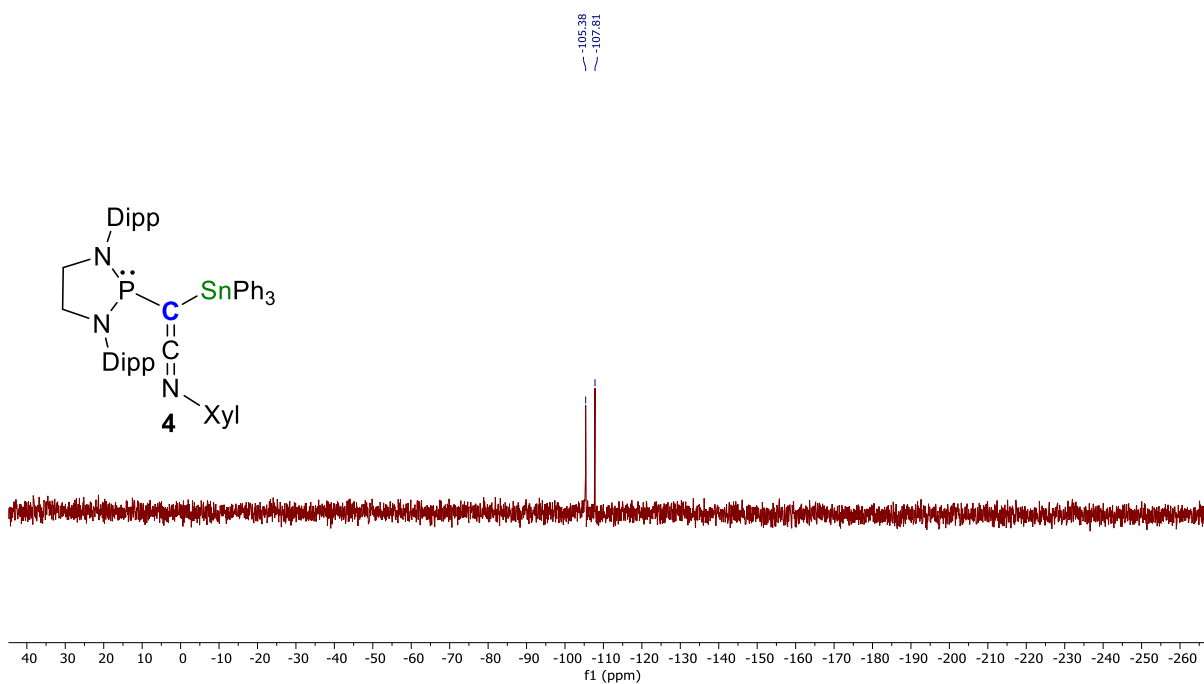

Figure S16.  $^{119}\text{Sn}$  NMR spectrum of 4 (149 MHz,  $\text{C}_6\text{D}_6$ ).

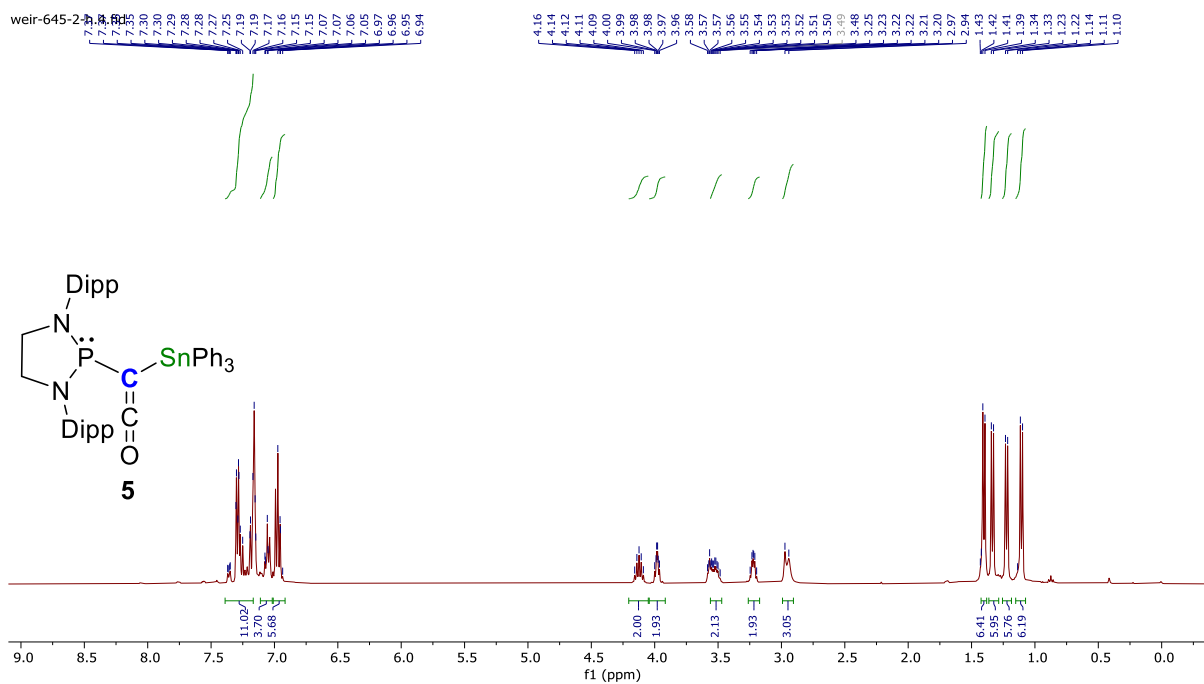

Figure S17.  $^1\text{H}$  NMR spectrum of **5** (400 MHz,  $\text{C}_6\text{D}_6$ ).

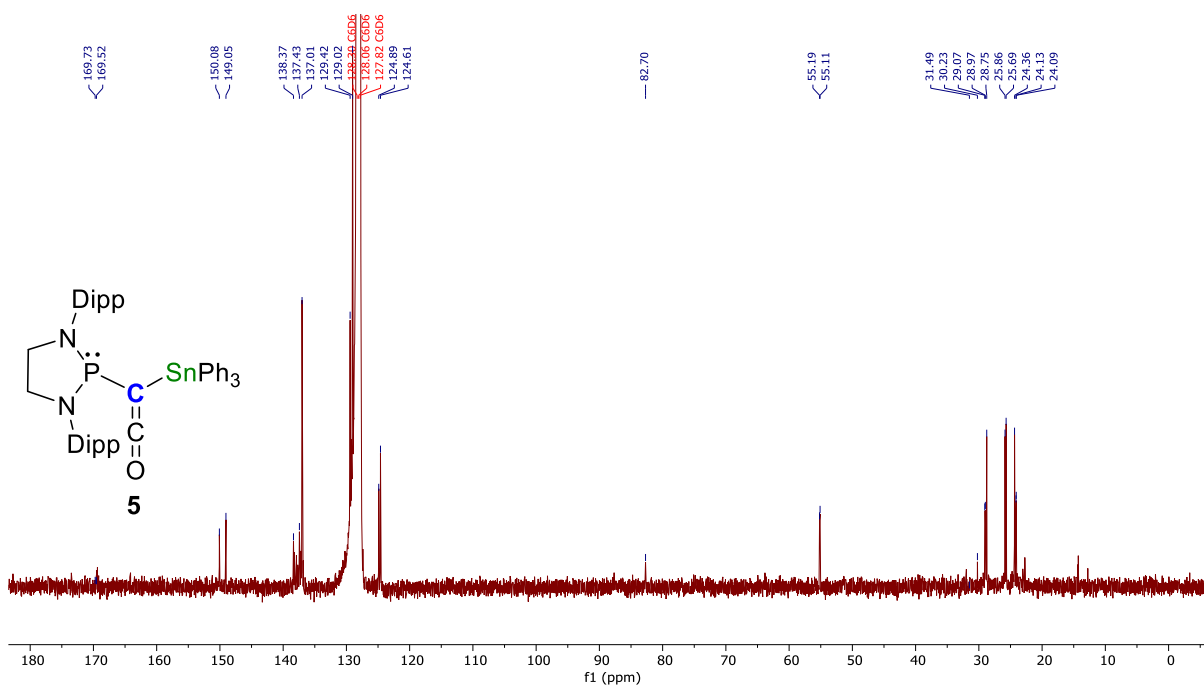

Figure S18.  $^{13}\text{C}\{^1\text{H}\}$  NMR spectrum of **5** (101 MHz,  $\text{C}_6\text{D}_6$ ).

weir-645-2-pcpd.1.fid

118.35  
118.31  
117.42  
116.53  
116.49

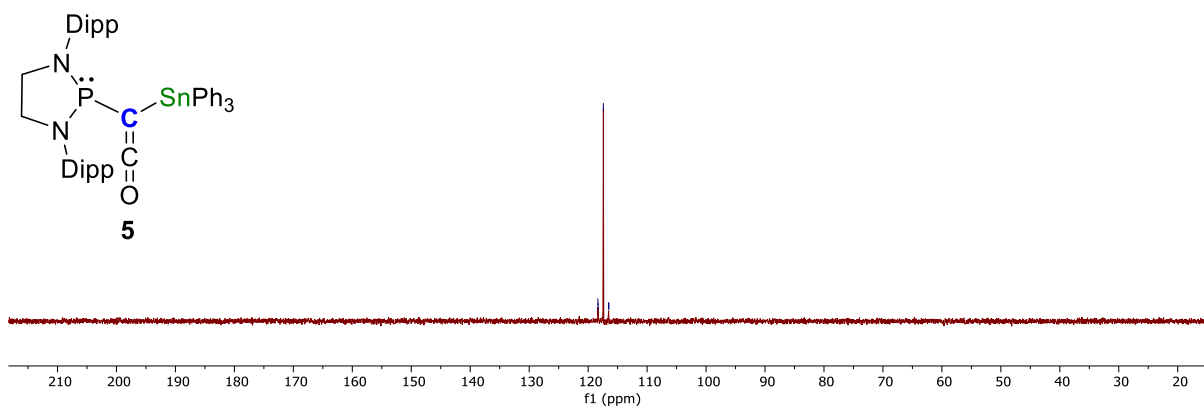

**Figure S19.** <sup>31</sup>P NMR spectrum of **5** (162 MHz, C<sub>6</sub>D<sub>6</sub>).

weir-xxx-1-sn.1.fid

-98.10  
-101.14

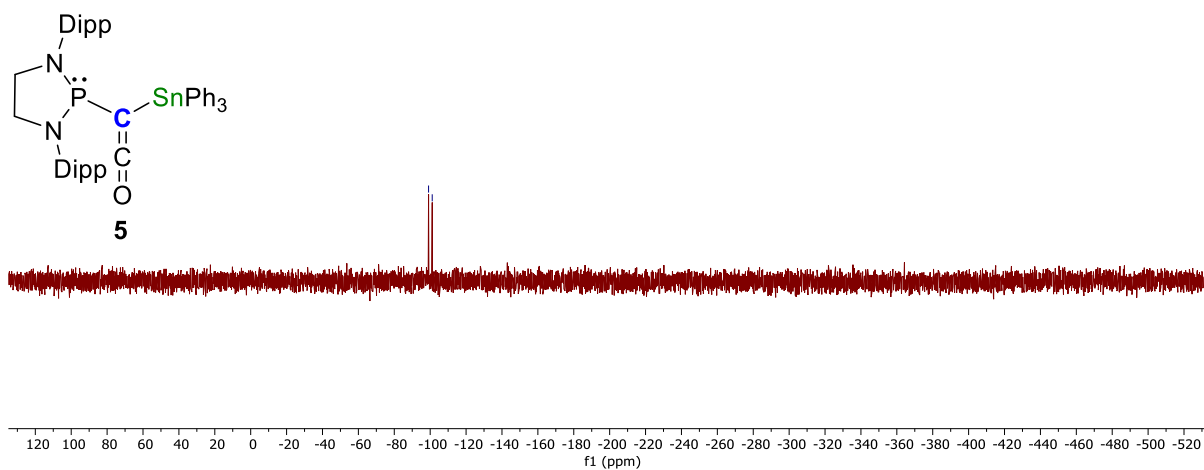

**Figure S20.** <sup>119</sup>Sn NMR spectrum of **5** (149 MHz, C<sub>6</sub>D<sub>6</sub>).



#### IV. X-ray Crystallographic Data

**Table S1 Crystal data and structure refinement for 1.**

|                                             |                                                               |
|---------------------------------------------|---------------------------------------------------------------|
| Identification code                         | 2189531                                                       |
| Empirical formula                           | C <sub>45</sub> H <sub>53</sub> N <sub>4</sub> PSn            |
| Formula weight                              | 799.57                                                        |
| Temperature/K                               | 100.0                                                         |
| Crystal system                              | triclinic                                                     |
| Space group                                 | P-1                                                           |
| a/Å                                         | 9.9707(5)                                                     |
| b/Å                                         | 10.4091(5)                                                    |
| c/Å                                         | 20.4298(11)                                                   |
| α /°                                        | 89.295(3)                                                     |
| β /°                                        | 76.839(3)                                                     |
| γ /°                                        | 77.221(3)                                                     |
| Volume/Å <sup>3</sup>                       | 2011.88(18)                                                   |
| Z                                           | 2                                                             |
| ρ <sub>calc</sub> /cm <sup>3</sup>          | 1.320                                                         |
| μ /mm <sup>-1</sup>                         | 5.691                                                         |
| F(000)                                      | 832.0                                                         |
| Crystal size/mm <sup>3</sup>                | 0.2 × 0.1 × 0.1                                               |
| Radiation                                   | CuK α (λ = 1.54178)                                           |
| 2θ range for data collection/°              | 4.446 to 136.878                                              |
| Index ranges                                | -12 ≤ h ≤ 12, -12 ≤ k ≤ 12,<br>-23 ≤ l ≤ 24                   |
| Reflections collected                       | 28065                                                         |
| Independent reflections                     | 7217 [R <sub>int</sub> = 0.0515, R <sub>sigma</sub> = 0.0456] |
| Data/restraints/parameters                  | 7217/0/468                                                    |
| Goodness-of-fit on F <sup>2</sup>           | 1.023                                                         |
| Final R indexes [I ≥ 2σ (I)]                | R <sub>1</sub> = 0.0303, wR <sub>2</sub> = 0.0695             |
| Final R indexes [all data]                  | R <sub>1</sub> = 0.0328, wR <sub>2</sub> = 0.0707             |
| Largest diff. peak/hole / e Å <sup>-3</sup> | 1.23/-0.64                                                    |

**Table S2 Crystal data and structure refinement for 2.**

|                                             |                                                               |
|---------------------------------------------|---------------------------------------------------------------|
| Identification code                         | 2178246                                                       |
| Empirical formula                           | C <sub>45</sub> H <sub>53</sub> N <sub>2</sub> PSn            |
| Formula weight                              | 771.55                                                        |
| Temperature/K                               | 100.0                                                         |
| Crystal system                              | monoclinic                                                    |
| Space group                                 | P2 <sub>1</sub> /c                                            |
| a/Å                                         | 10.1795(4)                                                    |
| b/Å                                         | 10.3793(2)                                                    |
| c/Å                                         | 38.5800(9)                                                    |
| α/°                                         | 90                                                            |
| β/°                                         | 91.604(2)                                                     |
| γ/°                                         | 90                                                            |
| Volume/Å <sup>3</sup>                       | 4074.6(2)                                                     |
| Z                                           | 4                                                             |
| ρ <sub>calc</sub> /cm <sup>3</sup>          | 1.258                                                         |
| μ/mm <sup>-1</sup>                          | 5.586                                                         |
| F(000)                                      | 1608.0                                                        |
| Crystal size/mm <sup>3</sup>                | 0.1 × 0.1 × 0.1                                               |
| Radiation                                   | CuKα (λ = 1.54178)                                            |
| 2θ range for data collection/°              | 4.582 to 136.644                                              |
| Index ranges                                | -10 ≤ h ≤ 12, -10 ≤ k ≤ 12, -45 ≤ l ≤ 46                      |
| Reflections collected                       | 35056                                                         |
| Independent reflections                     | 7314 [R <sub>int</sub> = 0.0688, R <sub>sigma</sub> = 0.0560] |
| Data/restraints/parameters                  | 7314/72/450                                                   |
| Goodness-of-fit on F <sup>2</sup>           | 1.166                                                         |
| Final R indexes [I ≥ 2σ (I)]                | R <sub>1</sub> = 0.0799, wR <sub>2</sub> = 0.1486             |
| Final R indexes [all data]                  | R <sub>1</sub> = 0.0983, wR <sub>2</sub> = 0.1556             |
| Largest diff. peak/hole / e Å <sup>-3</sup> | 1.44/-1.00                                                    |

**Table S3 Crystal data and structure refinement for 3.**

|                                             |                                                               |
|---------------------------------------------|---------------------------------------------------------------|
| Identification code                         | 2178248                                                       |
| Empirical formula                           | C <sub>49</sub> H <sub>62</sub> N <sub>3</sub> PSiSn          |
| Formula weight                              | 870.76                                                        |
| Temperature/K                               | 100.00                                                        |
| Crystal system                              | monoclinic                                                    |
| Space group                                 | P2 <sub>1</sub> /c                                            |
| a/Å                                         | 18.0214(5)                                                    |
| b/Å                                         | 12.3053(4)                                                    |
| c/Å                                         | 20.7838(6)                                                    |
| α/°                                         | 90                                                            |
| β/°                                         | 93.7730(10)                                                   |
| γ/°                                         | 90                                                            |
| Volume/Å <sup>3</sup>                       | 4599.0(2)                                                     |
| Z                                           | 4                                                             |
| ρ <sub>calc</sub> /cm <sup>3</sup>          | 1.258                                                         |
| μ/mm <sup>-1</sup>                          | 5.255                                                         |
| F(000)                                      | 1824.0                                                        |
| Crystal size/mm <sup>3</sup>                | 0.42 × 0.2 × 0.2                                              |
| Radiation                                   | CuKα (λ = 1.54178)                                            |
| 2θ range for data collection/°              | 4.914 to 136.562                                              |
| Index ranges                                | -21 ≤ h ≤ 21, -14 ≤ k ≤ 14, -14 ≤ l ≤ 25                      |
| Reflections collected                       | 55163                                                         |
| Independent reflections                     | 8416 [R <sub>int</sub> = 0.0306, R <sub>sigma</sub> = 0.0193] |
| Data/restraints/parameters                  | 8416/0/507                                                    |
| Goodness-of-fit on F <sup>2</sup>           | 1.042                                                         |
| Final R indexes [I ≥ 2σ (I)]                | R <sub>1</sub> = 0.0220, wR <sub>2</sub> = 0.0510             |
| Final R indexes [all data]                  | R <sub>1</sub> = 0.0237, wR <sub>2</sub> = 0.0518             |
| Largest diff. peak/hole / e Å <sup>-3</sup> | 0.36/-0.45                                                    |

**Table S4 Crystal data and structure refinement for 4.**

|                                             |                                                               |
|---------------------------------------------|---------------------------------------------------------------|
| Identification code                         | 2178247                                                       |
| Empirical formula                           | C <sub>54</sub> H <sub>62</sub> N <sub>3</sub> PSn            |
| Formula weight                              | 902.72                                                        |
| Temperature/K                               | 100.0                                                         |
| Crystal system                              | monoclinic                                                    |
| Space group                                 | P2 <sub>1</sub> /c                                            |
| a/Å                                         | 20.5741(4)                                                    |
| b/Å                                         | 18.2905(4)                                                    |
| c/Å                                         | 12.3909(3)                                                    |
| α/°                                         | 90                                                            |
| β/°                                         | 90.5410(10)                                                   |
| γ/°                                         | 90                                                            |
| Volume/Å <sup>3</sup>                       | 4662.62(18)                                                   |
| Z                                           | 4                                                             |
| ρ <sub>calc</sub> /cm <sup>3</sup>          | 1.286                                                         |
| μ/mm <sup>-1</sup>                          | 4.967                                                         |
| F(000)                                      | 1888.0                                                        |
| Crystal size/mm <sup>3</sup>                | 0.74 × 0.19 × 0.17                                            |
| Radiation                                   | CuKα (λ = 1.54178)                                            |
| 2θ range for data collection/°              | 4.294 to 137.474                                              |
| Index ranges                                | -24 ≤ h ≤ 24, -21 ≤ k ≤ 20, -14 ≤ l ≤ 14                      |
| Reflections collected                       | 73801                                                         |
| Independent reflections                     | 8553 [R <sub>int</sub> = 0.0526, R <sub>sigma</sub> = 0.0247] |
| Data/restraints/parameters                  | 8553/0/542                                                    |
| Goodness-of-fit on F <sup>2</sup>           | 1.036                                                         |
| Final R indexes [I ≥ 2σ (I)]                | R <sub>1</sub> = 0.0226, wR <sub>2</sub> = 0.0493             |
| Final R indexes [all data]                  | R <sub>1</sub> = 0.0273, wR <sub>2</sub> = 0.0509             |
| Largest diff. peak/hole / e Å <sup>-3</sup> | 0.36/-0.38                                                    |

**Table S5 Crystal data and structure refinement for 5.**

|                                             |                                                               |
|---------------------------------------------|---------------------------------------------------------------|
| Identification code                         | 2178249                                                       |
| Empirical formula                           | C <sub>46</sub> H <sub>53</sub> N <sub>2</sub> OPSn           |
| Formula weight                              | 799.56                                                        |
| Temperature/K                               | 100.0                                                         |
| Crystal system                              | triclinic                                                     |
| Space group                                 | P-1                                                           |
| a/Å                                         | 9.9668(4)                                                     |
| b/Å                                         | 10.3764(4)                                                    |
| c/Å                                         | 20.4573(8)                                                    |
| α/°                                         | 89.474(2)                                                     |
| β/°                                         | 76.827(2)                                                     |
| γ/°                                         | 77.353(2)                                                     |
| Volume/Å <sup>3</sup>                       | 2008.19(14)                                                   |
| Z                                           | 2                                                             |
| ρ <sub>calc</sub> /cm <sup>3</sup>          | 1.322                                                         |
| μ/mm <sup>-1</sup>                          | 5.707                                                         |
| F(000)                                      | 832.0                                                         |
| Crystal size/mm <sup>3</sup>                | 0.2 × 0.2 × 0.1                                               |
| Radiation                                   | CuKα (λ = 1.54178)                                            |
| 2θ range for data collection/°              | 4.44 to 144.47                                                |
| Index ranges                                | -11 ≤ h ≤ 12, -12 ≤ k ≤ 12, -24 ≤ l ≤ 25                      |
| Reflections collected                       | 35235                                                         |
| Independent reflections                     | 7653 [R <sub>int</sub> = 0.0268, R <sub>sigma</sub> = 0.0212] |
| Data/restraints/parameters                  | 7653/0/468                                                    |
| Goodness-of-fit on F <sup>2</sup>           | 1.073                                                         |
| Final R indexes [I ≥ 2σ (I)]                | R <sub>1</sub> = 0.0193, wR <sub>2</sub> = 0.0499             |
| Final R indexes [all data]                  | R <sub>1</sub> = 0.0198, wR <sub>2</sub> = 0.0501             |
| Largest diff. peak/hole / e Å <sup>-3</sup> | 0.45/-0.35                                                    |

## V. Computational Details

Density functional theory (DFT) calculations were carried out using the Gaussian 16 package<sup>S2</sup>. Geometry optimizations were performed with the M06-2X<sup>S3</sup> or BP86<sup>S4</sup> functional augmented with the D3 version of Grimme's empirical dispersion correction. The def2-SVP basis set was employed for all the atoms<sup>S5</sup>. Analytical frequency calculations were performed to identify the number of imaginary frequencies (zero for local minimum and one for transition states) and provide the thermal corrections of Gibbs free energy. For the mechanistic study, the single-point energy calculations were performed at the BP86-D3(BJ)/def2-TZVP level of theory based on the structures optimized at the BP86-D3(BJ)/def2-SVP level of theory. SMD method was used with tetrahydrofuran as the solvent, while Bondi radii were chosen as the atomic radii to define the molecular cavity<sup>S6</sup>. Natural bond orbital (NBO) calculations were carried out using NBO 7.0 program<sup>S7</sup> at the M06-2X/def2-SVP level of theory. Energy decomposition analyses based on extended transition state–natural orbitals for chemical valence (ETS-NOCV) calculations were carried out using Multiwfn package<sup>S8</sup> with the wave function obtained at the M06-2X/ def2-SVP level of theory using the Gaussian 16 package.

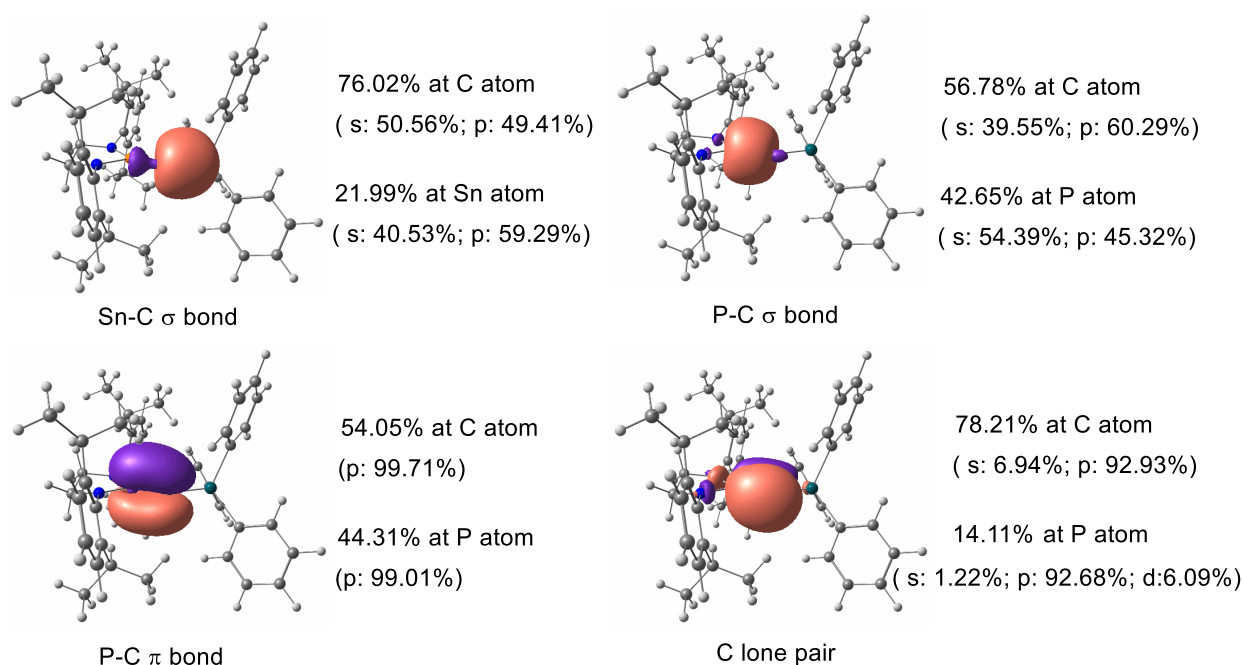

**Figure S21.** Selected NLMOs and orbital composition analysis of **2**.

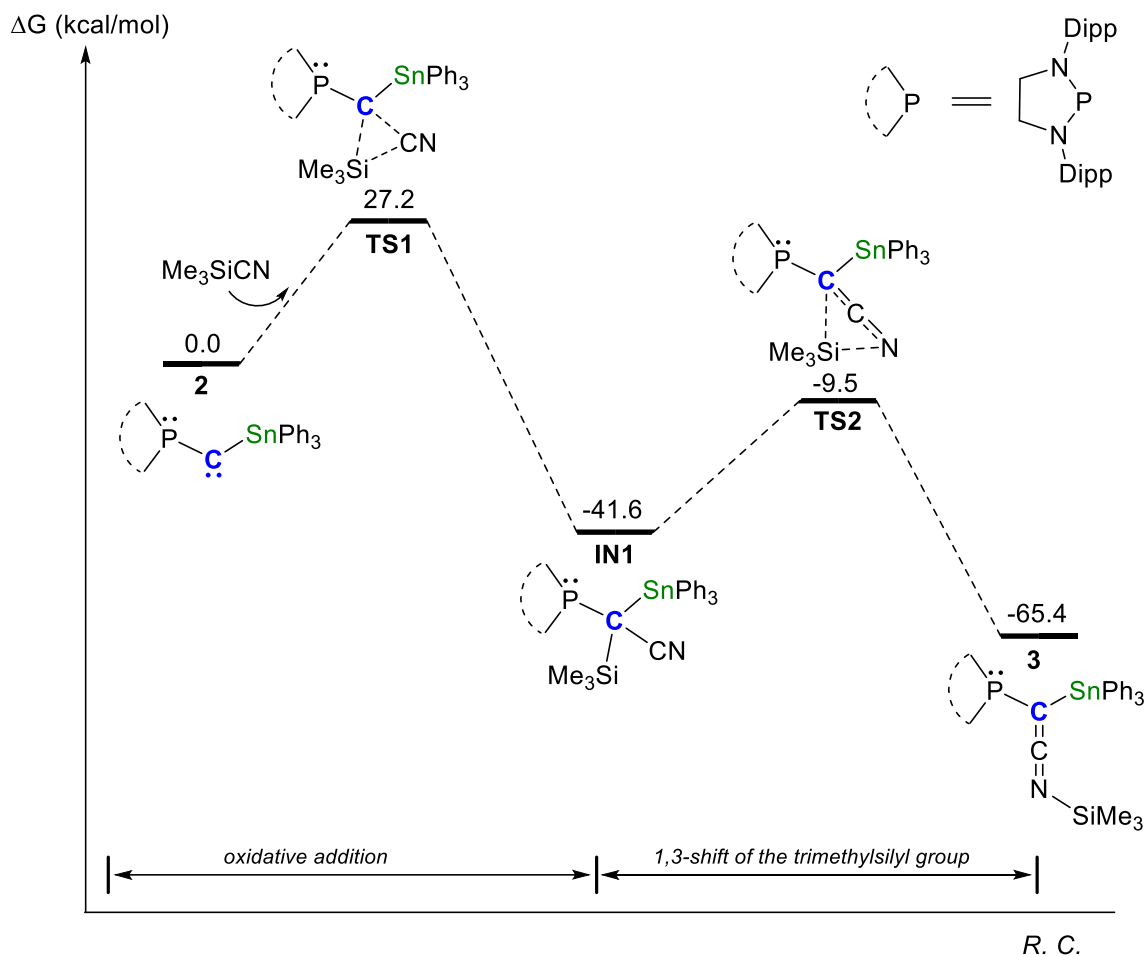

**Figure S22.** Computed free energy profile for the reaction of **2** and trimethylsilyl cyanide. Energies are given in kcal/mol.

```

----- Pair and NOCV orbital information -----
There are totally 576 NOCV pairs and 1152 NOCV orbitals
NOCV orbitals with absolute eigenvalues smaller than 1.0E-03 are not shown
Note: All energies are given in kcal/mol

```

| Pair | Energy  | Orbital | Eigenvalue | Energy  | Orbital | Eigenvalue | Energy |
|------|---------|---------|------------|---------|---------|------------|--------|
| 1    | -597.38 | 1       | 1.65250    | -153.84 | 1152    | -1.65250   | 207.66 |
| 2    | -72.30  | 2       | 0.58619    | -147.50 | 1151    | -0.58619   | -24.17 |
| 3    | -38.84  | 3       | 0.50975    | -131.33 | 1150    | -0.50975   | -55.14 |
| 4    | -17.99  | 4       | 0.27184    | -101.79 | 1149    | -0.27184   | -35.60 |
| 5    | -3.46   | 5       | 0.12440    | -20.57  | 1148    | -0.12440   | 7.21   |
| 6    | -2.82   | 6       | 0.10344    | -7.35   | 1147    | -0.10344   | 19.93  |

```

Sum of NOCV eigenvalues: -0.00000
Sum of pair energies: -741.39 kcal/mol

```

**Figure S23.** Selected ETS-NOCV analysis results of **4**.

Cartesian Coordinates:

2

0 1

|    |             |             |             |
|----|-------------|-------------|-------------|
| Sn | -1.20128300 | 1.48076100  | 0.13353000  |
| P  | 1.14610300  | -0.86610600 | 0.30420700  |
| N  | 0.60568000  | -2.48532600 | 0.17348900  |
| N  | 2.78363300  | -1.33490000 | 0.30051400  |
| C  | -1.64456300 | -2.84444200 | 1.15000400  |
| C  | -2.42201000 | 0.63857100  | -1.44175700 |
| C  | -0.75970600 | -2.89354700 | 0.03750500  |
| C  | -1.18459200 | -3.35912200 | -1.23844200 |
| C  | -0.70621300 | 3.48218300  | -0.52446600 |
| C  | -2.48983200 | -3.86852900 | -1.36036600 |
| H  | -2.83970300 | -4.24193800 | -2.33347700 |
| C  | -3.14106600 | 0.66861900  | -3.78109200 |
| H  | -3.08472200 | 1.11206000  | -4.78842600 |
| C  | -2.36583600 | 1.20097900  | -2.73561800 |
| H  | -1.70959900 | 2.06531800  | -2.93219600 |
| C  | -2.95081600 | -3.34656200 | 0.96809900  |
| H  | -3.65833800 | -3.32536000 | 1.80888400  |
| C  | -3.36103800 | -3.87717700 | -0.26203400 |
| H  | -4.38075600 | -4.27887800 | -0.37239400 |
| C  | -0.27200800 | -3.21479600 | -2.45361500 |
| H  | 0.77184500  | -3.38389700 | -2.11590500 |
| C  | -2.33790500 | 1.48313900  | 1.97019900  |
| C  | 1.69711100  | -3.46472900 | 0.26795000  |
| H  | 1.50148700  | -4.32743500 | -0.40168600 |
| H  | 1.78198700  | -3.85861800 | 1.30709600  |
| C  | -3.27119400 | -0.46292900 | -1.21136000 |
| H  | -3.31833300 | -0.93244300 | -0.21560400 |
| C  | -1.20319700 | -2.28092400 | 2.50003500  |
| H  | -0.57911900 | -1.38326200 | 2.28704500  |
| C  | -4.05514900 | -0.98978900 | -2.25320600 |
| H  | -4.71431900 | -1.84967700 | -2.05761800 |
| C  | -1.66130300 | 1.57147900  | 3.20549600  |
| H  | -0.55911300 | 1.61167800  | 3.22535000  |
| C  | -3.98992900 | -0.42685800 | -3.53969800 |
| H  | -4.60166200 | -0.84219700 | -4.35651800 |
| C  | 2.97878200  | -2.71859600 | -0.13637700 |
| H  | 3.87252200  | -3.15719600 | 0.35459400  |
| H  | 3.13855800  | -2.76975700 | -1.24099000 |
| C  | -1.68146600 | 4.37004700  | -1.02658700 |
| H  | -2.74010400 | 4.06312700  | -1.07557200 |
| C  | -3.74718500 | 1.41480600  | 1.96511100  |



|   |             |             |             |
|---|-------------|-------------|-------------|
| H | -4.29383600 | 1.34066400  | 1.00997400  |
| C | -4.46765700 | 1.43009300  | 3.17384300  |
| H | -5.56799100 | 1.36987500  | 3.15914800  |
| C | 3.80751600  | -0.35593400 | 0.06267500  |
| C | -0.34559400 | -1.76850100 | -2.98684500 |
| H | -1.36589400 | -1.53469500 | -3.35149200 |
| H | 0.36840500  | -1.62191000 | -3.82404600 |
| H | -0.10652500 | -1.02799200 | -2.19770100 |
| C | 0.02824000  | 6.05856200  | -1.42723900 |
| H | 0.31404000  | 7.06235700  | -1.78063200 |
| C | -0.55945100 | -4.22692200 | -3.57212500 |
| H | -0.55447400 | -5.27130400 | -3.19718200 |
| H | 0.20782600  | -4.14326500 | -4.36894600 |
| H | -1.54326600 | -4.03983900 | -4.05140100 |
| C | 0.70706800  | 0.66450000  | 0.45925100  |
| C | -3.78436200 | 1.52350600  | 4.39893600  |
| H | -4.34784200 | 1.53743800  | 5.34546100  |
| C | 4.38926300  | -0.58691600 | 2.53219900  |
| H | 3.93618600  | -1.58927900 | 2.37699900  |
| C | -2.37995200 | 1.59740900  | 4.41333600  |
| H | -1.84180400 | 1.66972900  | 5.37245000  |
| C | 0.64105400  | 3.89951100  | -0.47866700 |
| H | 1.40757200  | 3.20616000  | -0.09058600 |
| C | -1.31739300 | 5.65220100  | -1.47617600 |
| H | -2.08677400 | 6.33771800  | -1.86731700 |
| C | -2.37510000 | -1.81947200 | 3.37732900  |
| H | -3.04010600 | -1.11212800 | 2.84442700  |
| H | -1.99100900 | -1.29541500 | 4.27399400  |
| H | -2.98522900 | -2.67681200 | 3.73351900  |
| C | 4.65360800  | -0.00637200 | 1.14782700  |
| C | -0.33121700 | -3.28805600 | 3.27770800  |
| H | -0.90657300 | -4.21094500 | 3.50306700  |
| H | 0.00349900  | -2.84852400 | 4.24024900  |
| H | 0.57199200  | -3.58486100 | 2.71192500  |
| C | 1.00700600  | 5.18138800  | -0.92741700 |
| H | 2.06246900  | 5.49667800  | -0.88820500 |
| C | 3.94309400  | 0.24370900  | -1.21680100 |
| C | 4.97178100  | 1.19099000  | -1.39499500 |
| H | 5.09554400  | 1.67439300  | -2.37715800 |
| C | 3.00374400  | -0.08082200 | -2.37413100 |
| H | 2.26945100  | -0.83303200 | -2.01695400 |
| C | 5.66953400  | 0.94093100  | 0.92093400  |
| H | 6.33916000  | 1.22965100  | 1.74500400  |
| C | 5.83068200  | 1.53200900  | -0.34185300 |

|   |            |             |             |
|---|------------|-------------|-------------|
| H | 6.62922300 | 2.27357400  | -0.50263300 |
| C | 2.19014500 | 1.15547400  | -2.79846800 |
| H | 1.63001400 | 1.56284900  | -1.93391800 |
| H | 1.46004900 | 0.88880900  | -3.59069900 |
| H | 2.84590000 | 1.95780700  | -3.19703000 |
| C | 3.75603200 | -0.71271100 | -3.56039100 |
| H | 4.48804700 | -0.00304500 | -4.00046700 |
| H | 3.04602100 | -1.00117600 | -4.36373100 |
| H | 4.31613200 | -1.61967700 | -3.25082000 |
| C | 3.33397700 | 0.27584700  | 3.25930600  |
| H | 3.73537300 | 1.29270000  | 3.45612500  |
| H | 3.05379800 | -0.17895500 | 4.23307800  |
| H | 2.41745300 | 0.39514200  | 2.64565500  |
| C | 5.65565600 | -0.76262400 | 3.38301100  |
| H | 6.43136700 | -1.35027000 | 2.84966900  |
| H | 5.41348700 | -1.29026500 | 4.32870700  |
| H | 6.10376900 | 0.21368900  | 3.66505500  |

TMSCN

0 1

|    |             |             |             |
|----|-------------|-------------|-------------|
| Si | -2.30648700 | 0.19050800  | 0.06116800  |
| C  | -1.63810900 | 1.13596300  | 1.54880000  |
| H  | -1.99546000 | 2.18606000  | 1.54731400  |
| H  | -1.97728900 | 0.65689600  | 2.49150200  |
| H  | -0.52895300 | 1.14883400  | 1.54780800  |
| C  | -4.18962200 | 0.23406400  | -0.01391700 |
| H  | -4.56423700 | 1.27805800  | -0.02581600 |
| H  | -4.56447600 | -0.27752800 | -0.92394900 |
| H  | -4.62061900 | -0.27761700 | 0.87245800  |
| C  | -1.63821500 | -1.57056700 | -0.01373400 |
| H  | -1.99606700 | -2.09463100 | -0.92351200 |
| H  | -0.52906000 | -1.57614300 | -0.02598500 |
| H  | -1.97690000 | -2.14710300 | 0.87290200  |
| C  | -1.67910900 | 1.07756500  | -1.47528900 |
| N  | -1.28761500 | 1.63126600  | -2.43428700 |

IN1

0 1

|   |            |             |             |
|---|------------|-------------|-------------|
| P | 1.77239500 | -0.17205500 | -0.44427300 |
| C | 1.97768700 | 3.52550100  | 0.66419900  |
| N | 2.09135900 | 1.04125700  | 0.75005700  |
| N | 1.33045700 | -1.34184700 | 0.81398800  |
| C | 1.48309100 | -2.75115100 | 0.54626400  |
| C | 3.96145000 | 4.79102200  | -0.01839000 |

|   |             |             |             |
|---|-------------|-------------|-------------|
| H | 4.44947600  | 5.75821100  | -0.21663000 |
| C | 4.66145600  | 3.59379200  | -0.21776100 |
| H | 5.70423000  | 3.63051800  | -0.56448400 |
| C | 0.45930300  | -3.67028600 | 0.95320300  |
| C | 2.70188800  | 2.31298000  | 0.47709800  |
| C | 3.92272100  | -2.46129700 | -0.31006100 |
| H | 3.77103900  | -1.46302000 | 0.14581700  |
| C | 2.62946500  | -3.25343300 | -0.14209800 |
| C | 2.63746900  | 4.74837400  | 0.42747800  |
| H | 2.08434100  | 5.68881800  | 0.57091900  |
| C | 0.50709100  | -4.99336000 | 0.47376600  |
| H | -0.29479200 | -5.69129700 | 0.75435700  |
| C | 0.10225400  | 0.32881800  | -1.28920100 |
| C | 1.59790400  | 0.69196400  | 2.08409300  |
| H | 0.56260500  | 1.04479300  | 2.26559200  |
| H | 2.25102600  | 1.15176000  | 2.85482400  |
| C | -0.33560400 | 4.57357800  | 0.32782600  |
| H | -0.05953700 | 5.62266700  | 0.56390000  |
| H | -1.40585200 | 4.44754800  | 0.58882000  |
| H | -0.22310900 | 4.41156100  | -0.76041500 |
| C | -0.02597300 | -3.52713600 | 3.41100400  |
| H | -0.70178400 | -3.08877100 | 4.17523900  |
| H | 0.98310500  | -3.09380200 | 3.54777200  |
| H | 0.06002100  | -4.61670900 | 3.60867000  |
| C | 5.06215100  | -3.13618700 | 0.48131600  |
| H | 4.79644000  | -3.24593000 | 1.55254000  |
| H | 5.99106000  | -2.53194000 | 0.41409700  |
| H | 5.29225900  | -4.14776100 | 0.08634400  |
| C | 2.61861500  | -4.58273100 | -0.61381200 |
| H | 3.48442600  | -4.95248800 | -1.18586900 |
| C | 1.63736300  | -0.83112400 | 2.16553200  |
| H | 2.64224700  | -1.19168200 | 2.49285200  |
| H | 0.88887600  | -1.18159900 | 2.90280700  |
| C | 4.06124600  | 2.34777100  | 0.03909000  |
| C | 1.54967800  | -5.44154300 | -0.34844300 |
| H | 1.54716100  | -6.47050000 | -0.74049100 |
| C | -0.59325600 | -3.29115400 | 1.98845500  |
| H | -0.80052000 | -2.20671300 | 1.87038500  |
| C | 0.52236100  | 3.57216900  | 1.12342400  |
| H | 0.09116700  | 2.56167800  | 0.94817100  |
| C | -1.91879900 | -4.06077400 | 1.87549800  |
| H | -1.77512700 | -5.14716900 | 2.05118600  |
| H | -2.40711300 | -3.93246100 | 0.89143400  |
| H | -2.62250000 | -3.70849100 | 2.65491700  |

|    |             |             |             |
|----|-------------|-------------|-------------|
| C  | 0.44528700  | 3.90043700  | 2.63075100  |
| H  | 0.97108800  | 3.15360000  | 3.25854400  |
| H  | -0.60978800 | 3.96615700  | 2.97176900  |
| H  | 0.91636500  | 4.88621700  | 2.82660100  |
| C  | 4.31053100  | -2.24843800 | -1.78202600 |
| H  | 4.47539300  | -3.21524500 | -2.30223900 |
| H  | 5.24773000  | -1.66055100 | -1.86242800 |
| H  | 3.51577600  | -1.69578100 | -2.31978000 |
| C  | 4.87616800  | 1.06457100  | -0.07571500 |
| H  | 4.20725300  | 0.29810900  | -0.52131700 |
| C  | 5.29082200  | 0.57636900  | 1.32703000  |
| H  | 5.84662200  | -0.38235000 | 1.27036000  |
| H  | 4.40670800  | 0.41992300  | 1.97548200  |
| H  | 5.94545400  | 1.32492500  | 1.82113300  |
| C  | 6.09646100  | 1.16833200  | -1.00017200 |
| H  | 6.87601400  | 1.84644900  | -0.59268400 |
| H  | 5.81562400  | 1.53513900  | -2.00846700 |
| H  | 6.56881700  | 0.17101600  | -1.11771700 |
| C  | 0.32269800  | 1.67317700  | -1.75088000 |
| N  | 0.53689800  | 2.74241500  | -2.20163400 |
| Si | 0.08674500  | -0.67231600 | -2.98790000 |
| C  | 1.53315100  | -0.01020600 | -4.01371600 |
| H  | 1.60574700  | -0.59153400 | -4.95771100 |
| H  | 1.39514100  | 1.05994600  | -4.26587900 |
| H  | 2.49492700  | -0.11111300 | -3.47090300 |
| C  | -1.50120700 | -0.29736700 | -3.94014200 |
| H  | -1.40380100 | -0.71965700 | -4.96316000 |
| H  | -2.40614000 | -0.73095000 | -3.47434700 |
| H  | -1.64581700 | 0.79746500  | -4.04640700 |
| C  | 0.34201300  | -2.53267500 | -2.72514000 |
| H  | 1.33643900  | -2.83247500 | -3.11276500 |
| H  | 0.30316900  | -2.85141000 | -1.66722700 |
| H  | -0.43258600 | -3.10263100 | -3.27755600 |
| C  | -3.06248500 | -1.24969400 | -1.05143500 |
| C  | -4.36457300 | -0.95389700 | -1.50990000 |
| C  | -2.57400600 | -2.56428600 | -1.18734300 |
| C  | -5.15656600 | -1.95429600 | -2.10158200 |
| H  | -4.76105800 | 0.07124100  | -1.41947700 |
| C  | -3.36090800 | -3.56517100 | -1.78388700 |
| H  | -1.56352500 | -2.81889500 | -0.83604000 |
| C  | -4.65344500 | -3.26001900 | -2.24431300 |
| H  | -6.17000600 | -1.71165400 | -2.45957000 |
| H  | -2.95949100 | -4.58602200 | -1.88820800 |
| H  | -5.27089600 | -4.04098900 | -2.71573800 |

|    |             |             |             |
|----|-------------|-------------|-------------|
| C  | -2.86333500 | 2.20804900  | -0.62983500 |
| C  | -3.65930100 | 2.77685200  | 0.38922100  |
| C  | -2.76125900 | 2.87833500  | -1.86703800 |
| C  | -4.33103200 | 3.99449100  | 0.17925700  |
| H  | -3.75300800 | 2.27223300  | 1.36463600  |
| C  | -3.42946500 | 4.09670800  | -2.07669900 |
| H  | -2.13528700 | 2.47056800  | -2.67376600 |
| C  | -4.21231300 | 4.65878800  | -1.05355800 |
| H  | -4.94497400 | 4.42808300  | 0.98503100  |
| H  | -3.32831300 | 4.61463000  | -3.04361900 |
| H  | -4.72964400 | 5.61752200  | -1.21707400 |
| C  | -2.14918800 | 0.12157400  | 1.92313300  |
| C  | -1.73389600 | 1.07853900  | 2.87179500  |
| C  | -2.96665500 | -0.94334400 | 2.35469900  |
| C  | -2.07128900 | 0.94218700  | 4.23000700  |
| H  | -1.16400200 | 1.96194000  | 2.55592700  |
| C  | -3.31137700 | -1.08163900 | 3.71146600  |
| H  | -3.34746500 | -1.67288500 | 1.62325700  |
| C  | -2.85122400 | -0.14722100 | 4.65515600  |
| H  | -1.73047400 | 1.69841500  | 4.95519000  |
| H  | -3.94943200 | -1.92127100 | 4.03106600  |
| H  | -3.11717600 | -0.25670500 | 5.71840200  |
| Sn | -1.85635400 | 0.33835700  | -0.21777700 |

**TS1**

0 1

|   |             |             |             |
|---|-------------|-------------|-------------|
| P | 1.18973500  | -0.67619200 | -0.12006800 |
| C | -1.21013100 | -3.28553800 | -1.32682900 |
| N | 0.82421900  | -2.33469000 | -0.30101600 |
| N | 2.88584800  | -0.92493700 | -0.38024200 |
| C | 3.86818000  | -0.01211100 | 0.15124500  |
| C | -3.05178200 | -3.98733700 | 0.11871500  |
| H | -4.06712900 | -4.39603100 | 0.22982500  |
| C | -2.32256700 | -3.60902100 | 1.25470900  |
| H | -2.77502700 | -3.74577600 | 2.24609800  |
| C | 4.94135200  | 0.40857200  | -0.68906100 |
| C | -0.48985900 | -2.89301200 | -0.16572800 |
| C | 2.86218200  | -0.22576700 | 2.53168000  |
| H | 2.23476000  | -0.97970900 | 2.00772700  |
| C | 3.79583500  | 0.41425100  | 1.50733200  |
| C | -2.49233900 | -3.84278900 | -1.15277700 |
| H | -3.06928900 | -4.14972400 | -2.03704000 |
| C | 5.82094700  | 1.39199200  | -0.19953900 |
| H | 6.63949200  | 1.74724600  | -0.84360000 |

|   |             |             |             |
|---|-------------|-------------|-------------|
| C | 0.29153700  | 0.63930600  | -0.55905400 |
| C | 1.97173600  | -3.10887500 | -0.78988600 |
| H | 1.97424700  | -3.17480400 | -1.90029800 |
| H | 1.93429000  | -4.13901000 | -0.38091600 |
| C | -1.52971200 | -2.74960400 | -3.83861400 |
| H | -2.46972100 | -3.33792000 | -3.87931200 |
| H | -1.02598900 | -2.87077100 | -4.81990800 |
| H | -1.76686700 | -1.67554900 | -3.73309200 |
| C | 6.30248400  | -1.38324800 | -1.78436100 |
| H | 6.45527100  | -1.98739900 | -2.70330900 |
| H | 6.02992800  | -2.06952400 | -0.95736000 |
| H | 7.27661300  | -0.92478100 | -1.51251200 |
| C | 3.67242300  | -0.99627500 | 3.59272400  |
| H | 4.32661600  | -1.76256000 | 3.12807700  |
| H | 2.99053800  | -1.50554500 | 4.30537300  |
| H | 4.32132500  | -0.31221700 | 4.17874200  |
| C | 4.69319800  | 1.41052000  | 1.94364000  |
| H | 4.62441600  | 1.77760300  | 2.97969500  |
| C | 3.20960900  | -2.36132400 | -0.30570100 |
| H | 3.47201500  | -2.64174900 | 0.74211300  |
| H | 4.08295100  | -2.59037100 | -0.94584900 |
| C | -1.02579900 | -3.07341600 | 1.14669000  |
| C | 5.67719200  | 1.92191700  | 1.09062500  |
| H | 6.36012300  | 2.71043700  | 1.44326700  |
| C | 5.23982700  | -0.28150300 | -2.01826000 |
| H | 4.29718400  | -0.76363800 | -2.35576300 |
| C | -0.58887600 | -3.23059300 | -2.72153200 |
| H | 0.24879500  | -2.50345500 | -2.68365400 |
| C | 5.72382900  | 0.65417400  | -3.13891000 |
| H | 6.71165600  | 1.10118000  | -2.90002700 |
| H | 5.00786800  | 1.47455200  | -3.32894000 |
| H | 5.84899900  | 0.08202000  | -4.08124800 |
| C | -0.03137000 | -4.63083100 | -3.07347200 |
| H | 0.62664700  | -5.03964700 | -2.28070500 |
| H | 0.54220700  | -4.60152700 | -4.02367400 |
| H | -0.86665000 | -5.35118600 | -3.20381500 |
| C | 1.89680600  | 0.78289500  | 3.16408400  |
| H | 2.43456700  | 1.54572100  | 3.76504900  |
| H | 1.16891300  | 0.27854500  | 3.83251200  |
| H | 1.32314300  | 1.31058900  | 2.38180900  |
| C | -0.20709400 | -2.75208400 | 2.40171500  |
| H | 0.12828700  | -1.69056800 | 2.32067000  |
| C | 1.04875900  | -3.64301500 | 2.51573700  |
| H | 1.61382900  | -3.39730300 | 3.43811800  |

|    |             |             |             |
|----|-------------|-------------|-------------|
| H  | 1.73639200  | -3.51970900 | 1.66300100  |
| H  | 0.75658500  | -4.71267100 | 2.56891100  |
| C  | -0.99509300 | -2.89260800 | 3.71341900  |
| H  | -1.21963100 | -3.95857600 | 3.92957800  |
| H  | -1.95334900 | -2.34278600 | 3.70409400  |
| H  | -0.39412200 | -2.49870100 | 4.55752500  |
| Si | 1.01847100  | 2.34632100  | -1.59925000 |
| C  | 2.56543100  | 1.82938000  | -2.56113300 |
| H  | 2.77472600  | 0.75035300  | -2.44008600 |
| H  | 2.42674500  | 2.03277600  | -3.64232600 |
| H  | 3.44152900  | 2.39916400  | -2.19240400 |
| C  | 1.63901400  | 3.16122100  | 0.03612100  |
| H  | 2.20578300  | 4.09400300  | -0.17510700 |
| H  | 0.77558800  | 3.43867800  | 0.67767100  |
| H  | 2.28874400  | 2.47008500  | 0.60940400  |
| C  | 0.30206700  | 3.92462900  | -2.42878400 |
| H  | -0.07194100 | 3.74242500  | -3.45585300 |
| H  | -0.51863200 | 4.37456100  | -1.83649900 |
| H  | 1.12775900  | 4.66921900  | -2.47167300 |
| C  | -0.21646000 | 1.15727800  | -2.73473900 |
| N  | -0.92745900 | 0.53044200  | -3.44084500 |
| C  | -2.41210500 | 2.82830800  | -0.61822000 |
| C  | -2.40727000 | 4.02648900  | 0.12689400  |
| C  | -2.94900800 | 2.84296800  | -1.92384000 |
| C  | -2.89948200 | 5.22076500  | -0.42972600 |
| H  | -2.02353800 | 4.04233900  | 1.15799400  |
| C  | -3.44341500 | 4.03471000  | -2.47955600 |
| H  | -2.96314000 | 1.92622400  | -2.53094200 |
| C  | -3.41353300 | 5.22774800  | -1.73733700 |
| H  | -2.88112100 | 6.14921900  | 0.16336800  |
| H  | -3.84747400 | 4.03051200  | -3.50438600 |
| H  | -3.79376700 | 6.16349200  | -2.17710100 |
| C  | -3.28228100 | -0.42475600 | -0.29977200 |
| C  | -4.29289600 | -0.78711900 | 0.61595900  |
| C  | -3.43323100 | -0.77745700 | -1.65624500 |
| C  | -5.42475600 | -1.50182000 | 0.18475200  |
| H  | -4.22140900 | -0.49669700 | 1.67556700  |
| C  | -4.57177100 | -1.47872400 | -2.08937900 |
| H  | -2.66093100 | -0.48925000 | -2.38690900 |
| C  | -5.56834900 | -1.84560900 | -1.17035500 |
| H  | -6.20426500 | -1.78062800 | 0.91209100  |
| H  | -4.67531800 | -1.73854600 | -3.15491100 |
| H  | -6.46129800 | -2.39468900 | -1.50951400 |
| C  | -1.55209200 | 1.24390300  | 2.37393100  |

|    |             |             |            |
|----|-------------|-------------|------------|
| C  | -0.94393100 | 2.39770000  | 2.91623200 |
| C  | -2.06773400 | 0.28214300  | 3.26524800 |
| C  | -0.86203400 | 2.58702200  | 4.30602400 |
| H  | -0.49370200 | 3.15296000  | 2.25368600 |
| C  | -1.98089800 | 0.46011700  | 4.65800500 |
| H  | -2.53884700 | -0.62980200 | 2.86931600 |
| C  | -1.38028200 | 1.61701900  | 5.18154800 |
| H  | -0.38011200 | 3.49301200  | 4.70661200 |
| H  | -2.38534300 | -0.30850700 | 5.33595800 |
| H  | -1.31376000 | 1.76218900  | 6.27139900 |
| Sn | -1.71213200 | 0.96034700  | 0.23226900 |

**TS2**

0 1

|   |             |             |             |
|---|-------------|-------------|-------------|
| P | 1.67747500  | -0.11589500 | -0.35342300 |
| C | 2.06916400  | 3.46395200  | 0.63821200  |
| N | 2.22902800  | 0.98920500  | 0.87426200  |
| N | 1.28974500  | -1.32017700 | 0.89782100  |
| C | 1.38788600  | -2.71431100 | 0.56102700  |
| C | 4.08964300  | 4.72717400  | 0.06890500  |
| H | 4.58686700  | 5.69270200  | -0.11499800 |
| C | 4.80867500  | 3.52917400  | -0.05804900 |
| H | 5.86992500  | 3.56453700  | -0.34473500 |
| C | 0.36544900  | -3.63172000 | 0.97220200  |
| C | 2.81878500  | 2.25734500  | 0.56361700  |
| C | 3.80054100  | -2.44121300 | -0.35612100 |
| H | 3.67662700  | -1.46173900 | 0.14695000  |
| C | 2.48473100  | -3.20406500 | -0.21351100 |
| C | 2.73482100  | 4.68769100  | 0.41111100  |
| H | 2.16606600  | 5.62804600  | 0.48148300  |
| C | 0.35394600  | -4.92626500 | 0.41735900  |
| H | -0.44878600 | -5.62167300 | 0.70278900  |
| C | 0.00838400  | 0.44283000  | -0.88827900 |
| C | 1.70253400  | 0.67427700  | 2.19844600  |
| H | 0.68790800  | 1.09299100  | 2.37424900  |
| H | 2.37255400  | 1.08148100  | 2.98506000  |
| C | -0.20243900 | 4.30413700  | -0.12425600 |
| H | 0.06734600  | 5.38046400  | -0.08775200 |
| H | -1.29277700 | 4.22942100  | 0.05574700  |
| H | 0.00026400  | 3.93361800  | -1.14835100 |
| C | 0.03243200  | -3.58227000 | 3.45826700  |
| H | -0.59495400 | -3.18026700 | 4.28156900  |
| H | 1.04826900  | -3.15378000 | 3.55292000  |
| H | 0.12788700  | -4.67978000 | 3.59995100  |



|    |             |             |             |
|----|-------------|-------------|-------------|
| C  | 4.91580600  | -3.18704300 | 0.40675300  |
| H  | 4.63751200  | -3.34468500 | 1.46874800  |
| H  | 5.86122400  | -2.60544200 | 0.37773400  |
| H  | 5.11987900  | -4.18334900 | -0.03873900 |
| C  | 2.41405200  | -4.50098600 | -0.76313300 |
| H  | 3.24111000  | -4.85865800 | -1.39740900 |
| C  | 1.64431800  | -0.85377600 | 2.25307300  |
| H  | 2.63128600  | -1.27540700 | 2.56152000  |
| H  | 0.88593900  | -1.16851500 | 2.99791200  |
| C  | 4.19793300  | 2.28730900  | 0.19022700  |
| C  | 1.33706400  | -5.34836900 | -0.48867700 |
| H  | 1.28636400  | -6.35286300 | -0.93719300 |
| C  | -0.61760700 | -3.28171900 | 2.08448500  |
| H  | -0.81379400 | -2.18997300 | 2.02272000  |
| C  | 0.57236800  | 3.49357600  | 0.93249400  |
| H  | 0.20607100  | 2.44741500  | 0.87268100  |
| C  | -1.96110300 | -4.02557800 | 2.02202900  |
| H  | -1.82606100 | -5.12035500 | 2.14625100  |
| H  | -2.50385200 | -3.85164800 | 1.07352800  |
| H  | -2.61027200 | -3.69201500 | 2.85520600  |
| C  | 0.29125100  | 4.03338500  | 2.34864400  |
| H  | 0.78636500  | 3.42211700  | 3.13118200  |
| H  | -0.80001000 | 4.05234000  | 2.55385800  |
| H  | 0.66663500  | 5.07302800  | 2.45482300  |
| C  | 4.20865300  | -2.16919500 | -1.81297400 |
| H  | 4.31405400  | -3.11152400 | -2.39059900 |
| H  | 5.18357300  | -1.64138700 | -1.85447600 |
| H  | 3.45890300  | -1.52999000 | -2.31918500 |
| C  | 4.99496800  | 0.99120000  | 0.10560400  |
| H  | 4.31538000  | 0.24101900  | -0.34847100 |
| C  | 5.36975400  | 0.49171200  | 1.51501200  |
| H  | 5.89946600  | -0.48238400 | 1.46494700  |
| H  | 4.46821000  | 0.35681000  | 2.14314200  |
| H  | 6.03580900  | 1.22036500  | 2.02369800  |
| C  | 6.23636100  | 1.07279300  | -0.79285900 |
| H  | 7.01815400  | 1.73887700  | -0.36967400 |
| H  | 5.98443400  | 1.44319900  | -1.80764100 |
| H  | 6.69461800  | 0.06758500  | -0.89929300 |
| C  | 0.04480000  | 1.34985500  | -1.93330900 |
| N  | 0.04481300  | 2.07926600  | -2.90263000 |
| Si | 0.11548100  | -0.22087700 | -3.46372000 |
| C  | 1.59912900  | 0.26508700  | -4.51030300 |
| H  | 1.85363500  | -0.56076800 | -5.20866800 |
| H  | 1.42321500  | 1.20312800  | -5.06983700 |

|    |             |             |             |
|----|-------------|-------------|-------------|
| H  | 2.47084300  | 0.42198100  | -3.84025600 |
| C  | -1.60448500 | -0.09151700 | -4.19765000 |
| H  | -1.74032600 | -0.92556900 | -4.91914200 |
| H  | -2.37501700 | -0.22218800 | -3.41035300 |
| H  | -1.76233600 | 0.87499000  | -4.71226300 |
| C  | 0.41435000  | -2.00122800 | -2.92862700 |
| H  | 0.46703100  | -2.61544000 | -3.85651000 |
| H  | 1.36679700  | -2.12933800 | -2.38114400 |
| H  | -0.40754100 | -2.38782900 | -2.30192900 |
| C  | -3.01394600 | -1.27831500 | -0.95365200 |
| C  | -4.27173600 | -1.04283200 | -1.54950100 |
| C  | -2.43683100 | -2.56003000 | -1.06474900 |
| C  | -4.93405500 | -2.06898000 | -2.24850400 |
| H  | -4.73659100 | -0.04499200 | -1.47875000 |
| C  | -3.09647100 | -3.58810100 | -1.76075400 |
| H  | -1.45499400 | -2.76662800 | -0.60964200 |
| C  | -4.34567900 | -3.34170700 | -2.35696500 |
| H  | -5.91329500 | -1.87267700 | -2.71408700 |
| H  | -2.62679800 | -4.58183900 | -1.83863900 |
| H  | -4.86271700 | -4.14339100 | -2.90794700 |
| C  | -3.01646800 | 2.16297700  | -0.43096400 |
| C  | -3.60314900 | 2.89668500  | 0.62356800  |
| C  | -3.10122600 | 2.67298000  | -1.74503300 |
| C  | -4.24872100 | 4.12069900  | 0.37372400  |
| H  | -3.55157500 | 2.51495500  | 1.65669300  |
| C  | -3.74528100 | 3.89725900  | -1.99548900 |
| H  | -2.64515300 | 2.13070200  | -2.58612800 |
| C  | -4.31550000 | 4.62519000  | -0.93678500 |
| H  | -4.69810400 | 4.68471600  | 1.20691200  |
| H  | -3.79314800 | 4.28879900  | -3.02412500 |
| H  | -4.81367300 | 5.58780300  | -1.13365800 |
| C  | -2.20479900 | 0.09554600  | 2.15315000  |
| C  | -1.67863800 | 0.99879500  | 3.10029600  |
| C  | -3.05259800 | -0.93834100 | 2.60203000  |
| C  | -1.94745100 | 0.84010100  | 4.47166400  |
| H  | -1.06824500 | 1.85278600  | 2.77509800  |
| C  | -3.32770600 | -1.09752800 | 3.97187900  |
| H  | -3.50462800 | -1.63133300 | 1.87479700  |
| C  | -2.76405600 | -0.21631300 | 4.91099400  |
| H  | -1.52237200 | 1.55140500  | 5.19777700  |
| H  | -3.98925500 | -1.91253500 | 4.30699900  |
| H  | -2.97474000 | -0.34305600 | 5.98466900  |
| Sn | -1.95440600 | 0.33432900  | 0.01918900  |

4

0 1

|    |             |             |             |
|----|-------------|-------------|-------------|
| Sn | 16.85386300 | 9.45493800  | 2.07871300  |
| C  | 15.73662500 | 9.44311200  | 3.92069000  |
| C  | 17.49526100 | 11.44698000 | 1.58746800  |
| C  | 15.36568000 | 8.62058000  | 0.76718100  |
| C  | 18.58689100 | 8.19891700  | 2.29476900  |
| P  | 15.06430200 | 7.74253900  | 4.25977300  |
| C  | 16.87109800 | 12.18201100 | 0.57064100  |
| C  | 18.51659600 | 12.06030500 | 2.32905800  |
| C  | 15.66916700 | 7.70464800  | -0.24835600 |
| C  | 14.01822900 | 8.91686300  | 1.02408100  |
| C  | 18.46922500 | 6.89272500  | 2.79481300  |
| C  | 19.86664300 | 8.69550500  | 2.00954600  |
| N  | 13.49380300 | 8.02502800  | 4.93488000  |
| N  | 15.63355300 | 7.27701200  | 5.81545600  |
| H  | 16.07208800 | 11.72784700 | -0.02283400 |
| C  | 17.25025600 | 13.49914400 | 0.30643800  |
| H  | 19.02014300 | 11.51336400 | 3.13218700  |
| C  | 18.90054900 | 13.37585500 | 2.06478200  |
| H  | 16.70893700 | 7.43823300  | -0.45778700 |
| C  | 14.65077500 | 7.10608900  | -0.99344900 |
| H  | 13.74763500 | 9.60096200  | 1.83547100  |
| C  | 12.99804500 | 8.32261300  | 0.28094000  |
| H  | 17.48420200 | 6.47121100  | 3.02021800  |
| C  | 19.60270400 | 6.10976100  | 3.01382500  |
| H  | 19.98836500 | 9.70712200  | 1.61157300  |
| C  | 21.00200200 | 7.91348400  | 2.22957900  |
| C  | 12.31787700 | 7.96206000  | 4.13025900  |
| C  | 13.38389400 | 7.72081800  | 6.35705700  |
| C  | 16.93115600 | 6.72634400  | 6.03880400  |
| C  | 14.80884800 | 7.79546800  | 6.90078400  |
| H  | 16.75289800 | 14.06019000 | -0.48682100 |
| C  | 18.26403300 | 14.09725000 | 1.05472100  |
| H  | 19.69509400 | 13.84010500 | 2.65156200  |
| H  | 14.90105600 | 6.38964800  | -1.77801100 |
| C  | 13.31633800 | 7.41523300  | -0.72994600 |
| H  | 11.95672200 | 8.55804000  | 0.50961800  |
| C  | 20.87030900 | 6.62171500  | 2.73645500  |
| H  | 19.49258400 | 5.09947000  | 3.41089100  |
| H  | 21.99149000 | 8.31558500  | 2.00458900  |
| C  | 11.50775700 | 9.11447700  | 4.01774100  |
| C  | 11.95176700 | 6.76398100  | 3.47327500  |
| H  | 12.95891200 | 6.70858800  | 6.50804300  |

|   |             |             |             |
|---|-------------|-------------|-------------|
| H | 12.72000300 | 8.44198600  | 6.86349200  |
| C | 17.13721600 | 5.34770800  | 5.78000700  |
| C | 17.98917000 | 7.53010200  | 6.50676700  |
| H | 15.05823300 | 8.84037600  | 7.16495300  |
| H | 14.93831400 | 7.17571200  | 7.80129500  |
| H | 18.56059900 | 15.12709900 | 0.84879900  |
| H | 12.52157100 | 6.94050400  | -1.30821000 |
| H | 21.75704600 | 6.01049300  | 2.91324000  |
| C | 11.82447800 | 10.39365300 | 4.77442200  |
| C | 10.35696700 | 9.05501600  | 3.22462700  |
| C | 12.75995500 | 5.48321700  | 3.60450000  |
| C | 10.80469800 | 6.75803300  | 2.67398800  |
| C | 15.99980100 | 4.48695600  | 5.25304000  |
| C | 18.39284400 | 4.79750700  | 6.04068400  |
| C | 19.22967200 | 6.93292900  | 6.76503200  |
| C | 17.83441800 | 9.02549200  | 6.71575600  |
| H | 12.83244100 | 10.27852600 | 5.20130500  |
| C | 11.83737400 | 11.62271000 | 3.86329000  |
| C | 10.83418300 | 10.59809100 | 5.92793100  |
| H | 9.71997400  | 9.93778600  | 3.13849700  |
| C | 10.00856300 | 7.89095700  | 2.54784200  |
| H | 13.50245400 | 5.63637100  | 4.40107000  |
| C | 13.50554800 | 5.16407600  | 2.30318600  |
| C | 11.88923600 | 4.30025600  | 4.03986600  |
| H | 10.52520400 | 5.84269900  | 2.14779500  |
| H | 15.47922900 | 5.08140500  | 4.48648400  |
| C | 14.99791500 | 4.17254400  | 6.36980800  |
| C | 16.46133900 | 3.19799800  | 4.57606700  |
| C | 19.43277500 | 5.57931700  | 6.54181900  |
| H | 18.56840100 | 3.73815700  | 5.85045200  |
| H | 20.05168300 | 7.55015900  | 7.13464200  |
| H | 16.83936100 | 9.30770400  | 6.36173100  |
| C | 18.84003500 | 9.81345200  | 5.87041200  |
| C | 17.92991400 | 9.40633800  | 8.19560000  |
| H | 10.87338600 | 11.75345800 | 3.34865200  |
| H | 12.62244500 | 11.54163400 | 3.09538400  |
| H | 12.02531400 | 12.53110800 | 4.45358300  |
| H | 11.11034400 | 11.48785200 | 6.51479100  |
| H | 10.80685300 | 9.72717000  | 6.59974600  |
| H | 9.81398400  | 10.74967400 | 5.54129800  |
| H | 9.11094500  | 7.86489000  | 1.92752700  |
| H | 14.14028900 | 4.27270000  | 2.42986200  |
| H | 14.14318400 | 6.00349900  | 1.98931200  |
| H | 12.79064100 | 4.95909400  | 1.49018500  |

|   |             |             |            |
|---|-------------|-------------|------------|
| H | 11.12870100 | 4.05551100  | 3.28341500 |
| H | 11.37055800 | 4.51190800  | 4.98640800 |
| H | 12.51190300 | 3.40326900  | 4.17862600 |
| H | 15.47922500 | 3.56623800  | 7.15275800 |
| H | 14.13799800 | 3.60844000  | 5.97738800 |
| H | 14.62029100 | 5.09332700  | 6.83391600 |
| H | 17.20709600 | 3.39535200  | 3.79158300 |
| H | 15.60159300 | 2.69516000  | 4.10931300 |
| H | 16.89902500 | 2.49092400  | 5.29720600 |
| H | 20.40626600 | 5.12933000  | 6.74381200 |
| H | 19.86848300 | 9.69191600  | 6.24487100 |
| H | 18.59304700 | 10.88635300 | 5.89497800 |
| H | 18.82411200 | 9.46801100  | 4.82514600 |
| H | 17.16845800 | 8.88176000  | 8.79207300 |
| H | 17.78387900 | 10.48987000 | 8.32256000 |
| H | 18.91666300 | 9.14644000  | 8.60962900 |
| C | 15.51319500 | 10.48808000 | 4.68251600 |
| N | 15.37769300 | 11.39008800 | 5.48491700 |
| C | 14.55849400 | 12.50668300 | 5.67925300 |
| C | 14.52876800 | 13.54359000 | 4.72787700 |
| C | 13.81582600 | 12.57346200 | 6.87091400 |
| C | 13.73182000 | 14.65757000 | 4.99925000 |
| C | 15.30591800 | 13.42389900 | 3.44917300 |
| C | 13.01514300 | 13.69645700 | 7.09017600 |
| C | 13.88085700 | 11.43690600 | 7.85084200 |
| H | 13.69974100 | 15.46950800 | 4.26993900 |
| C | 12.97341500 | 14.73735200 | 6.16528100 |
| H | 16.37171900 | 13.22386000 | 3.63676700 |
| H | 15.22539100 | 14.33965000 | 2.85019600 |
| H | 14.93121600 | 12.58713500 | 2.83761400 |
| H | 12.42455600 | 13.75323100 | 8.00712300 |
| H | 13.35736000 | 11.68652100 | 8.78232600 |
| H | 14.92627800 | 11.18127300 | 8.08239000 |
| H | 13.41575400 | 10.53079100 | 7.42796600 |
| H | 12.35118600 | 15.61291400 | 6.35438800 |

## VI. Reference.

- S1. C. Y. Hu, X. F. Wang, R. Wei, C. P. Hu, D. A. Ruiz, X. Y. Chang and L. L. Liu, *Chem*, 2022, **8**, 2278-2289.
- S2. Gaussian 16, Revision A.03, M. J. Frisch, G. W. Trucks, H. B. Schlegel, G. E. Scuseria, M. A. Robb, J. R. Cheeseman, G. Scalmani, V. Barone, G. A. Petersson, H. Nakatsuji, X. Li, M. Caricato, A. V. Marenich, J. Bloino, B. G. Janesko, R. Gomperts, B. Mennucci, H. P. Hratchian, J. V. Ortiz, A. F. Izmaylov, J. L. Sonnenberg, D. Williams-Young, F. Ding, F. Lipparini, F. Egidi, F. Goings, J. B. Peng, A. Petrone, T. Henderson, D. Ranasinghe, V. G. Zakrzewski, J. Gao, N. Rega, G. Zheng, W. Liang, M. Hada, M. Ehara, K. Toyota, R. Fukuda, J. Hasegawa, M. Ishida, T. Nakajima, Y. Honda, O. Kitao, H. Nakai, T. Vreven, K. Throssell, J. A. Montgomery Jr, J. E. Peralta, F. Ogliaro, M. J. Bearpark, J. J. Heyd, E. N. Brothers, K. N. Kudin, V. N. Staroverov, T. A. Keith, R. Kobayashi, J. Normand, K. Raghavachari, A. P. Rendell, J. C. Burant, S. S. Iyengar, J. Tomasi, M. Cossi, J. M. Millam, M. Klene, C. Adamo, R. Cammi, J. W. Ochterski, R. L. Martin, K. Morokuma, O. Farkas, J. B. Foresman, D. J. Fox, Gaussian, Inc., Wallingford CT, 2016.
- S3 Y. Zhao, D. G. Truhlar, *Theor. Chem. Acc.*, 2008, **120**, 215-241.
- S4. (a) A. D. Becke, *Phys. Rev. A*, 1988, **38**, 3098-3100; (b), J. P. Perdew, *Phys. Rev. B*, 1986, **33**, 8822-8824.
- S5. F. Weigend, R. Ahlrichs, *Phys. Chem. Chem. Phys.*, 2005, **7**, 3297-3305.
- S6. A. v. Bondi, *J. Phys. Chem.*, 1964, **68**, 441-451.
- S7. E. D. Glendening, J. K. Badenhoop, A. E. Reed, J. E. Carpenter, J. A. Bohmann, C. M. Morales, P. Karafiloglou, C. R. Landis, F. Weinhold, *NBO 7.0, University of Wisconsin: Madison, WI*, 2018.
- S8. T. Lu and F. Chen, *J. Comput. Chem.*, 2012, **33**, 580-592
